# Supplementary material for: Molecular-iodine-catalyzed aerobic oxidative synthesis of β-hydroxy sulfones from alkenes
Source: Royal Society of Chemistry journal article supplement (doi:10.1039/c3ra47863g), 2014-01-01

## Supporting Information

# Molecular-iodine-catalyzed aerobic oxidative synthesis of $\beta$ -hydroxy sulfones from alkenes

Atsumasa Kariya, Tomoaki Yamaguchi, Tomoya Nobuta, Norihiro Tada, Tsuyoshi Miura and Akichika Itoh\*

*Gifu Pharmaceutical University, 1-25-4 Daigaku-nishi, Gifu 501-1196, Japan*

*E-mail: [itoha@gifu-pu.ac.jp](mailto:itoha@gifu-pu.ac.jp)*

|                                                    |                     |      |
|----------------------------------------------------|---------------------|------|
| 1.                                                 | General Information | SI-2 |
| 2.                                                 | General Procedure   | SI-2 |
| 3.                                                 | References          | SI-5 |
| Appendix: $^1\text{H}$ and $^{13}\text{C}$ spectra |                     | SI-6 |

## 1. General Information.

All dry solvents were obtained from Kanto Kagaku Co., Ltd. Other chemicals used were of reagent grade and were obtained from Tokyo Kasei Kogyo Co., Ltd., Wako Pure Chemical Industries, Ltd., and Nacalai Tesque.  $^1\text{H}$  NMR and  $^{13}\text{C}$  NMR spectra were obtained on a JEOL ECA 500 and a JEOL AL 400 at room temperature in  $\text{CDCl}_3$  or  $\text{CD}_3\text{OD}$  as a solvent (500 MHz and 400MHz for  $^1\text{H}$  NMR and 125 MHz and 100MHz for  $^{13}\text{C}$  NMR). Chemical shifts ( $\delta$ ) are expressed in parts per million and are internally referenced [0.00 ppm (tetramethylsilane) for  $^1\text{H}$  NMR and 77.0 ppm ( $\text{CDCl}_3$ ) or 49.0 ( $\text{CD}_3\text{OD}$ ) for  $^{13}\text{C}$  NMR]. Flash column chromatography was performed with Silica Gel 60N (Kanto Chemical Co., Inc., 40–50  $\mu\text{m}$  spherical, neutral).

## 2. General Procedure

**Synthesis of 1-phenyl-2-(phenylsulfonyl)ethanol (3aa) (Table 1, Entry 21):** A solution of styrene (**1a**, 0.3 mmol), sodium benzenesulfinate dihydrate (**2a**, 0.6 mmol),  $\text{I}_2$  (0.03 mmol) in MeCN (1 mL) and AcOH (0.4 mL) was stirred for 20 h. The reaction mixture was washed with aq.  $\text{Na}_2\text{S}_2\text{O}_3$ , dried over magnesium sulfate, and concentrated *in vacuo*. Purification of the crude product by flash chromatography on silica gel (hexane : ethyl acetate = 5 : 1) provided 1-phenyl-2-(phenylsulfonyl)ethanol (**3aa**) (73.2 mg, 93%).

### Synthesis of 1-phenyl-2-(phenylsulfonyl)ethanol (3aa)<sup>1</sup> (Table 2)

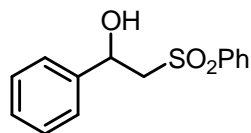

$^1\text{H}$ -NMR (500 MHz,  $\text{CDCl}_3$ ):  $\delta$  = 7.95 (d,  $J$  = 7.5 Hz, 2H), 7.68 (t,  $J$  = 7.5 Hz, 1H), 7.58 (t,  $J$  = 7.5 Hz, 2H), 7.32-7.24 (m, 5H), 5.27 (d,  $J$  = 9.7 Hz, 1 H), 3.72 (br s, 1H), 3.50 (dd,  $J$  = 14.3 Hz, 9.7 Hz, 1H), 3.33 (dd,  $J$  = 14.3 Hz, 1.7 Hz, 1H).  
 $^{13}\text{C}$ -NMR (125 MHz,  $\text{CDCl}_3$ ):  $\delta$  = 140.5, 139.0, 134.1, 129.4, 128.7, 128.3, 127.9, 125.6, 68.4, 63.8.

### 1-(4-chlorophenyl)-2-(phenylsulfonyl)ethanol (3ba)<sup>1</sup> (Table 2)

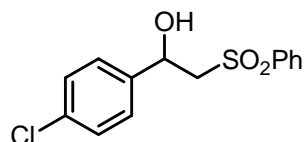

$^1\text{H}$ -NMR (500 MHz,  $\text{CDCl}_3$ ):  $\delta$  = 7.93 (d,  $J$  = 7.5 Hz, 2H), 7.69 (t,  $J$  = 7.5 Hz, 1H), 7.58 (t,  $J$  = 7.5 Hz, 2H), 7.27 (d,  $J$  = 8.6 Hz, 2H), 7.22 (d,  $J$  = 8.6 Hz, 2H), 5.26 (d,  $J$  = 10.1 Hz, 1 H), 3.83 (br s, 1H), 3.46 (dd,  $J$  = 14.4 Hz, 10.1 Hz, 1H), 3.29 (dd,  $J$  = 14.4 Hz, 1.7 Hz, 1H).  $^{13}\text{C}$ -NMR (125 MHz,  $\text{CDCl}_3$ ):  $\delta$  = 139.1, 138.9, 134.2, 134.0, 129.5, 128.8, 127.9, 127.0, 67.7, 63.7.

### 1-(4-bromophenyl)-2-(phenylsulfonyl)ethanol (3ca)<sup>1</sup> (Table 2)

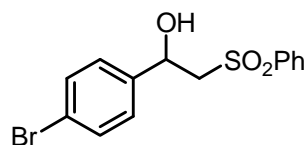

$^1\text{H}$ -NMR (500 MHz,  $\text{CDCl}_3$ ):  $\delta$  = 7.92 (d,  $J$  = 7.7 Hz, 2H), 7.68 (t,  $J$  = 7.7 Hz, 1H), 7.58 (t,  $J$  = 7.7 Hz, 2H), 7.41 (d,  $J$  = 8.6 Hz, 2H), 7.15 (d,  $J$  = 8.6 Hz, 2H), 5.23 (d,  $J$  = 9.8 Hz, 1 H), 3.87 (br s, 1H), 3.46 (dd,  $J$  = 14.3 Hz, 9.8 Hz, 1H), 3.29

(dd,  $J = 14.3$  Hz, 1.7 Hz, 1H).  $^{13}\text{C-NMR}$  (125 MHz,  $\text{CDCl}_3$ ):  $\delta = 139.6, 138.9, 134.2, 131.8, 129.5, 127.9, 127.3, 122.2, 67.8, 63.6$ .

### 1-(4-carboxic acid phenyl)-2-(phenylsulfonyl)ethanol (3da) (Table 2)

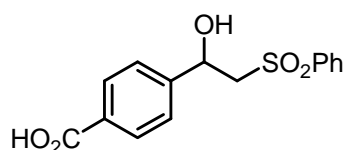

$^1\text{H-NMR}$  (400 MHz,  $\text{CD}_3\text{OD}$ ):  $\delta = 7.95\text{-}7.91$  (m, 4H), 7.70-7.60 (m, 1H), 7.59-7.56 (m, 2H), 7.40 (d,  $J = 8.4$  Hz, 2H), 5.21 (dd,  $J = 8.8$  Hz, 3.7 Hz, 1H), 4.93 (br s, 1H), 3.68 (dd,  $J = 14.8$  Hz, 8.8 Hz, 1H), 3.55 (dd,  $J = 14.8$  Hz, 3.7 Hz, 1H).  $^{13}\text{C-NMR}$  (100 MHz,  $\text{CD}_3\text{OD}$ ):  $\delta = 169.4, 148.8, 141.5, 134.8, 131.0, 130.2, 129.3, 127.2, 69.6, 64.3$ . Anal. Calcd for  $\text{C}_{15}\text{H}_{14}\text{O}_5\text{S}$ : C, 58.81; H, 4.61. Found: C, 58.67; H, 4.58.

### 2-(phenylsulfonyl)-1-*p*-tolylethanol (3ea)<sup>1</sup> (Table 2)

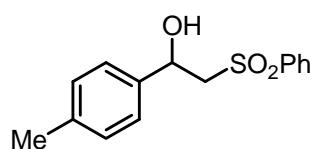

$^1\text{H-NMR}$  (500 MHz,  $\text{CDCl}_3$ ):  $\delta = 7.94$  (d,  $J = 8.0$  Hz, 2H), 7.67 (t,  $J = 8.0$  Hz, 1H), 7.58 (t,  $J = 8.0$  Hz, 2H), 7.41 (d,  $J = 8.1$  Hz, 2H), 7.15 (d,  $J = 8.1$  Hz, 2H), 5.23 (d,  $J = 10.3$  Hz, 1H), 3.62 (br s, 1H), 3.49 (dd,  $J = 14.3$  Hz, 10.3 Hz, 1H), 3.32 (dd,  $J = 14.3$  Hz, 1.7 Hz, 1H), 2.31 (s, 3H).  $^{13}\text{C-NMR}$  (125 MHz,  $\text{CDCl}_3$ ):  $\delta = 139.1, 138.2, 137.6, 134.1, 129.4, 129.4, 127.9, 125.5, 68.3, 63.8, 21.1$ .

### 1-(4-*t*-Butylphenyl)-2-(phenylsulfonyl)ethanol (3fa) (Table 2)

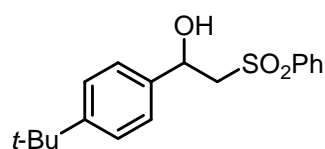

$^1\text{H-NMR}$  (400 MHz,  $\text{CDCl}_3$ ):  $\delta = 7.94$  (d,  $J = 8.3$  Hz, 2H), 7.66 (t,  $J = 8.3$  Hz, 1H), 7.56 (t,  $J = 8.3$  Hz, 2H), 7.33 (d,  $J = 8.6$  Hz, 2H), 7.21 (d,  $J = 8.6$  Hz, 2H), 5.25 (d,  $J = 10.0$  Hz, 1H), 3.63 (br s, 1H), 3.52 (dd,  $J = 14.2$  Hz, 10.0 Hz, 1H), 3.35 (dd,  $J = 14.2$  Hz, 1.5 Hz, 1H), 1.27 (s, 9H).  $^{13}\text{C-NMR}$  (100 MHz,  $\text{CDCl}_3$ ):  $\delta = 151.4, 139.2, 137.6, 134.0, 129.4, 127.9, 125.6, 125.4, 68.2, 63.8, 34.5, 31.2$ . Anal. Calcd for  $\text{C}_{18}\text{H}_{22}\text{O}_3\text{S}$ : C, 67.89; H, 6.96. Found: C, 67.63; H, 6.99.

### 1-(4-methoxyphenyl)-2-(phenylsulfonyl)ethanol (3ga)<sup>1</sup> (Table 2)

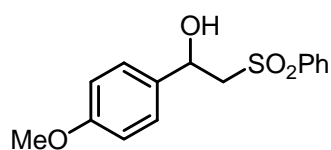

$^1\text{H-NMR}$  (500 MHz,  $\text{CDCl}_3$ ):  $\delta = 7.95$  (d,  $J = 8.0$  Hz, 2H), 7.68 (t,  $J = 8.0$  Hz, 1H), 7.59 (t,  $J = 8.0$  Hz, 2H), 7.21 (d,  $J = 8.6$  Hz, 2H), 6.84 (d,  $J = 8.6$  Hz, 2H), 5.23 (d,  $J = 9.3$  Hz, 1H), 3.78 (s, 3H), 3.60 (br s, 1H), 3.50 (dd,  $J = 14.4$  Hz, 9.3 Hz, 1H), 3.32 (dd,  $J = 14.4$  Hz, 1.2 Hz, 1H).  $^{13}\text{C-NMR}$  (125 MHz,  $\text{CDCl}_3$ ):  $\delta = 159.5, 139.1, 134.1, 132.7, 129.5, 128.0$ ,

127.0, 114.1, 68.1, 63.9, 55.3.

**2-(phenylsulfonyl)-1-o-tolylethanol (3ha)<sup>1</sup> (Table 2)**

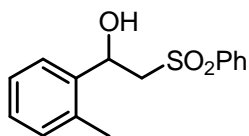

<sup>1</sup>H-NMR (500 MHz, CDCl<sub>3</sub>): δ = 7.97 (d, *J* = 8.1 Hz, 2H), 7.68 (t, *J* = 8.1 Hz, 1H), 7.59 (t, *J* = 8.1 Hz, 2H), 7.48 (d, *J* = 7.8 Hz, 1H), 7.19-7.14 (m, 2H), 7.07 (d, *J* = 7.8 Hz, 1H), 5.43 (d, *J* = 10.0 Hz, 1H), 3.68 (br s, 1H), 3.43 (dd, *J* = 14.3 Hz, 10.0 Hz, 1H), 3.24 (d, *J* = 14.3 Hz, 1H), 2.07 (s, 3H). <sup>13</sup>C-NMR (125 MHz, CDCl<sub>3</sub>): δ = 138.9, 138.6, 134.1, 133.6, 130.5, 129.5, 128.0, 128.0, 126.6, 125.2, 64.9, 62.8, 18.5.

**2-Hydroxy-2-phenylpropyl 4-methylphenyl sulfone (3ia)<sup>2</sup> (Table 2)**

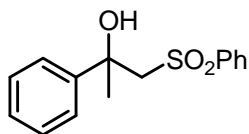

<sup>1</sup>H-NMR (400 MHz, CDCl<sub>3</sub>): δ = 7.59-7.51 (m, 3H), 7.38 (t, *J* = 7.8 Hz, 2H), 7.27 (d, *J* = 7.1 Hz, 2H), 7.17 (d, *J* = 7.1 Hz, 3H), 4.64 (br s, 1H), 3.75 (d, *J* = 14.8 Hz, 1H), 3.62 (d, *J* = 14.8 Hz, 1H), 1.70 (s, 3H). <sup>13</sup>C-NMR (100 MHz, CDCl<sub>3</sub>): δ = 144.2, 140.1, 133.4, 129.0, 128.2, 127.4, 127.2, 124.6, 73.1, 66.5, 30.8.

**1-Benzenesulphonyl-2-iodocyclohexane (4ja)<sup>3</sup> (Table 2)**

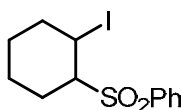

<sup>1</sup>H-NMR (400 MHz, CDCl<sub>3</sub>): δ = 7.90 (d, *J* = 8.1 Hz, 2H), 7.70 (t, *J* = 8.1 Hz, 1H), 7.59 (d, *J* = 8.1 Hz, 2H), 5.12 (d, *J* = 2.7 Hz, 1H), 3.36 (dd, *J* = 2.7 Hz, 2.0 Hz, 1H), 2.28-2.19 (m, 2H), 2.05-1.95 (m, 3H), 1.75-1.67 (m, 2H), 1.57-1.53 (m, 1H). <sup>13</sup>C-NMR (125 MHz, CDCl<sub>3</sub>): δ = 138.0, 134.0, 129.4, 128.5, 67.4, 33.5, 25.1, 22.4, 21.7, 21.0.

**2-Hydroxy-2-phenylethyl 4-methylphenyl sulfone (3ab)<sup>2</sup> (Table 2)**

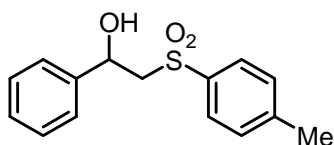

<sup>1</sup>H-NMR (500 MHz, CDCl<sub>3</sub>): δ = 7.82 (d, *J* = 8.0 Hz, 2H), 7.37 (d, *J* = 8.0 Hz, 2H), 7.32-7.24 (m, 5H), 5.24 (d, *J* = 9.3 Hz, 1H), 3.79 (br s, 1H), 3.47 (dd, *J* = 14.3 Hz, 9.3 Hz, 1H), 3.31 (dd, *J* = 14.3 Hz, 1.8 Hz, 1H), 2.45 (s, 3H). <sup>13</sup>C-NMR (125 MHz, CDCl<sub>3</sub>): δ = 145.2, 140.6, 136.0, 130.1, 128.7, 128.2, 128.0, 125.6, 68.4, 63.9, 21.6.

**2-Hydroxy-2-phenylethyl 4-chlorophenyl sulfone (3ac) (Table 2)**

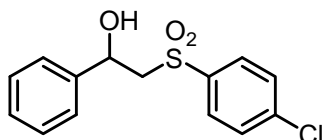

<sup>1</sup>H-NMR (400 MHz, CDCl<sub>3</sub>): δ = 7.87 (m, 2H), 7.53 (m, 2H), 7.35-7.26 (m, 5H), 5.27 (dd, *J* = 10.2 Hz, 2.0 Hz, 1 H), 3.52 (dd, *J* = 14.6 Hz, 10.2 Hz, 1H), 3.33 (dd, *J* = 14.6 Hz, 2.0 Hz, 1H). <sup>13</sup>C-NMR (100 MHz, CDCl<sub>3</sub>): δ = 140.8, 140.5, 137.7, 129.7, 129.5, 128.8, 128.4, 125.6, 68.5, 63.9. Anal. Calcd for C<sub>14</sub>H<sub>13</sub>ClO<sub>3</sub>S: C, 56.66; H, 4.42. Found: C, 56.46; H, 4.13.

### 3. References

- (1) X. Wan, Q. Meng, H. Zhang, Y. Sun, W. Fan and Z. Zhang, *Org. Lett.*, 2007, **9**, 5613-5616.
- (2) T. Taniguchi, A. Idota and H. Ishibashi, *Org. Biomol. Chem.*, 2011, **9**, 3151–3153.
- (3) L. M. Harwood, M. Julia and G. Le Thuillier, *Tetrahedron*, 1980, **36**, 2483-2487.

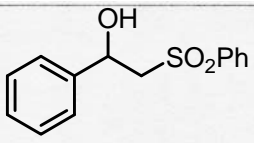

3aa

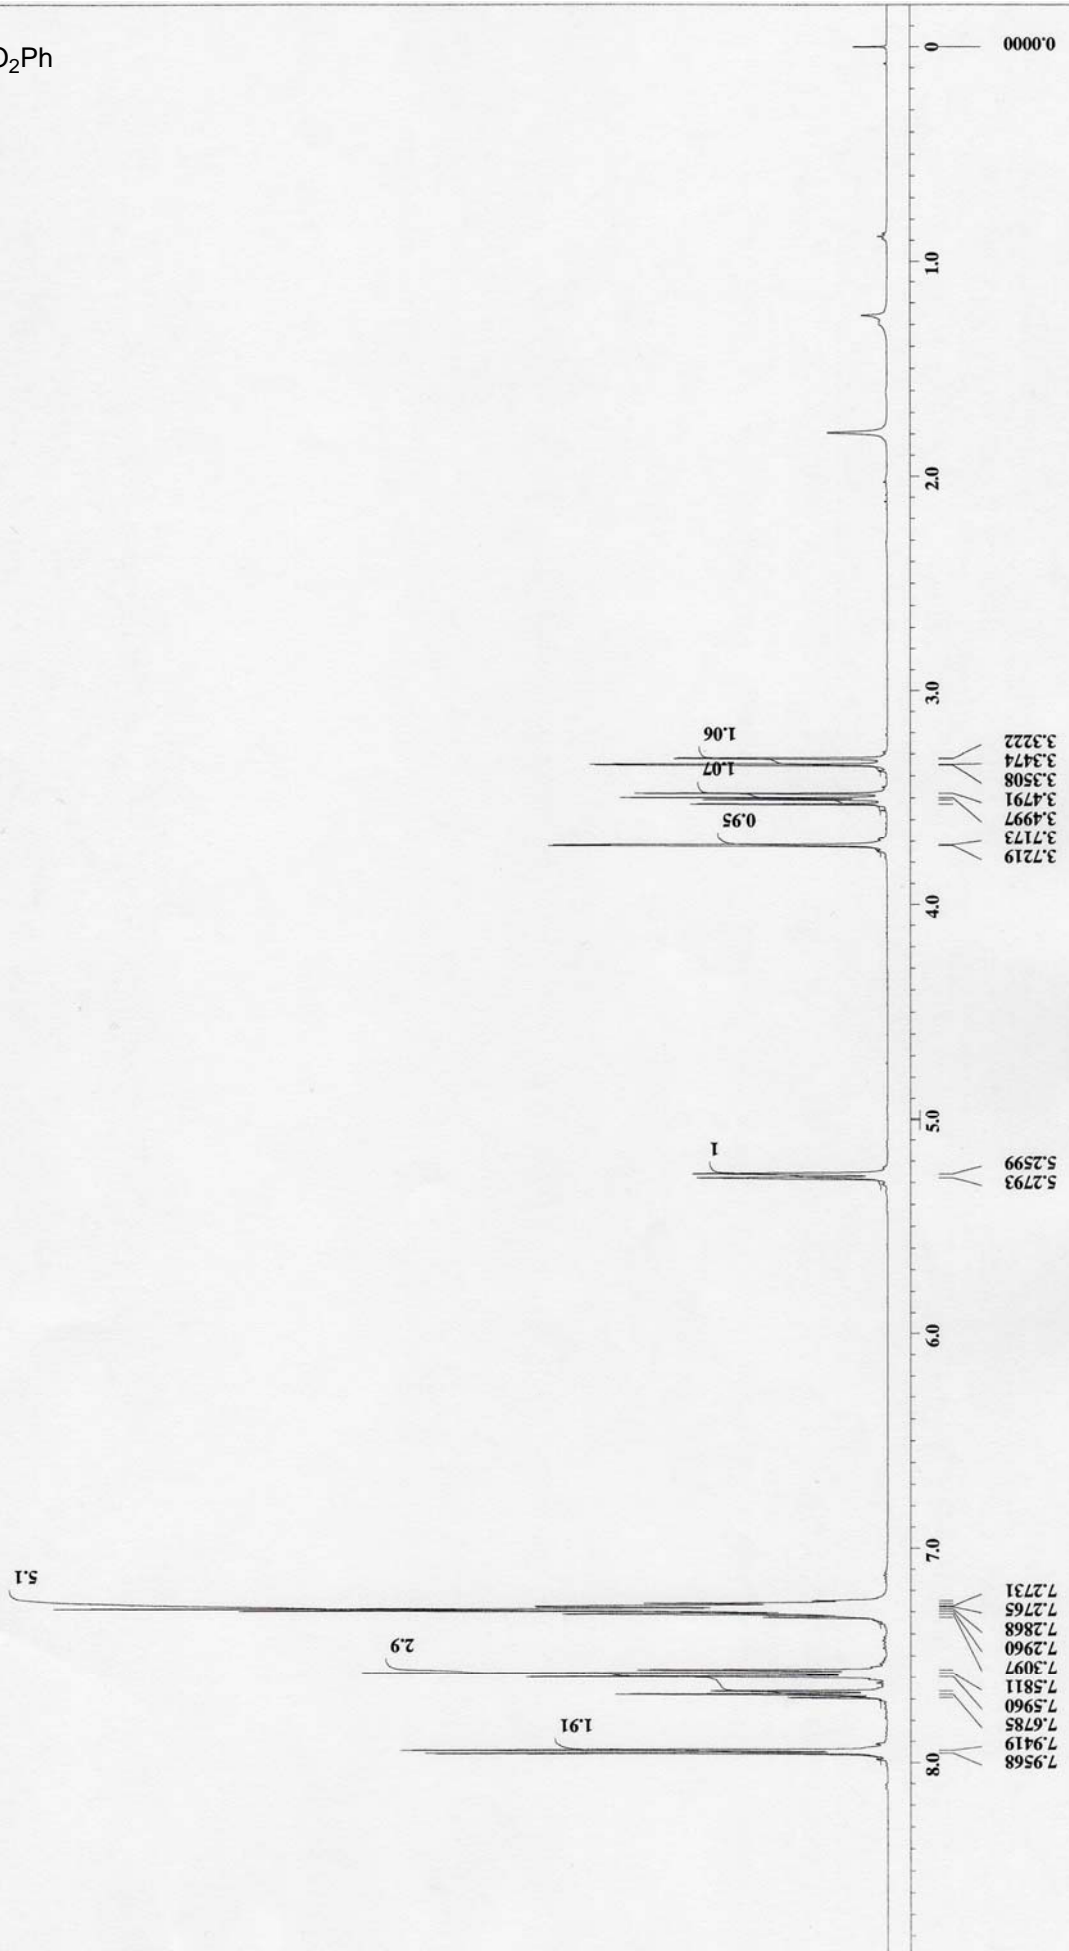

X : parts per Million : 1H

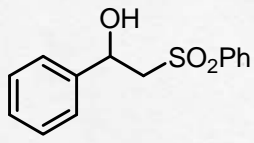

3aa

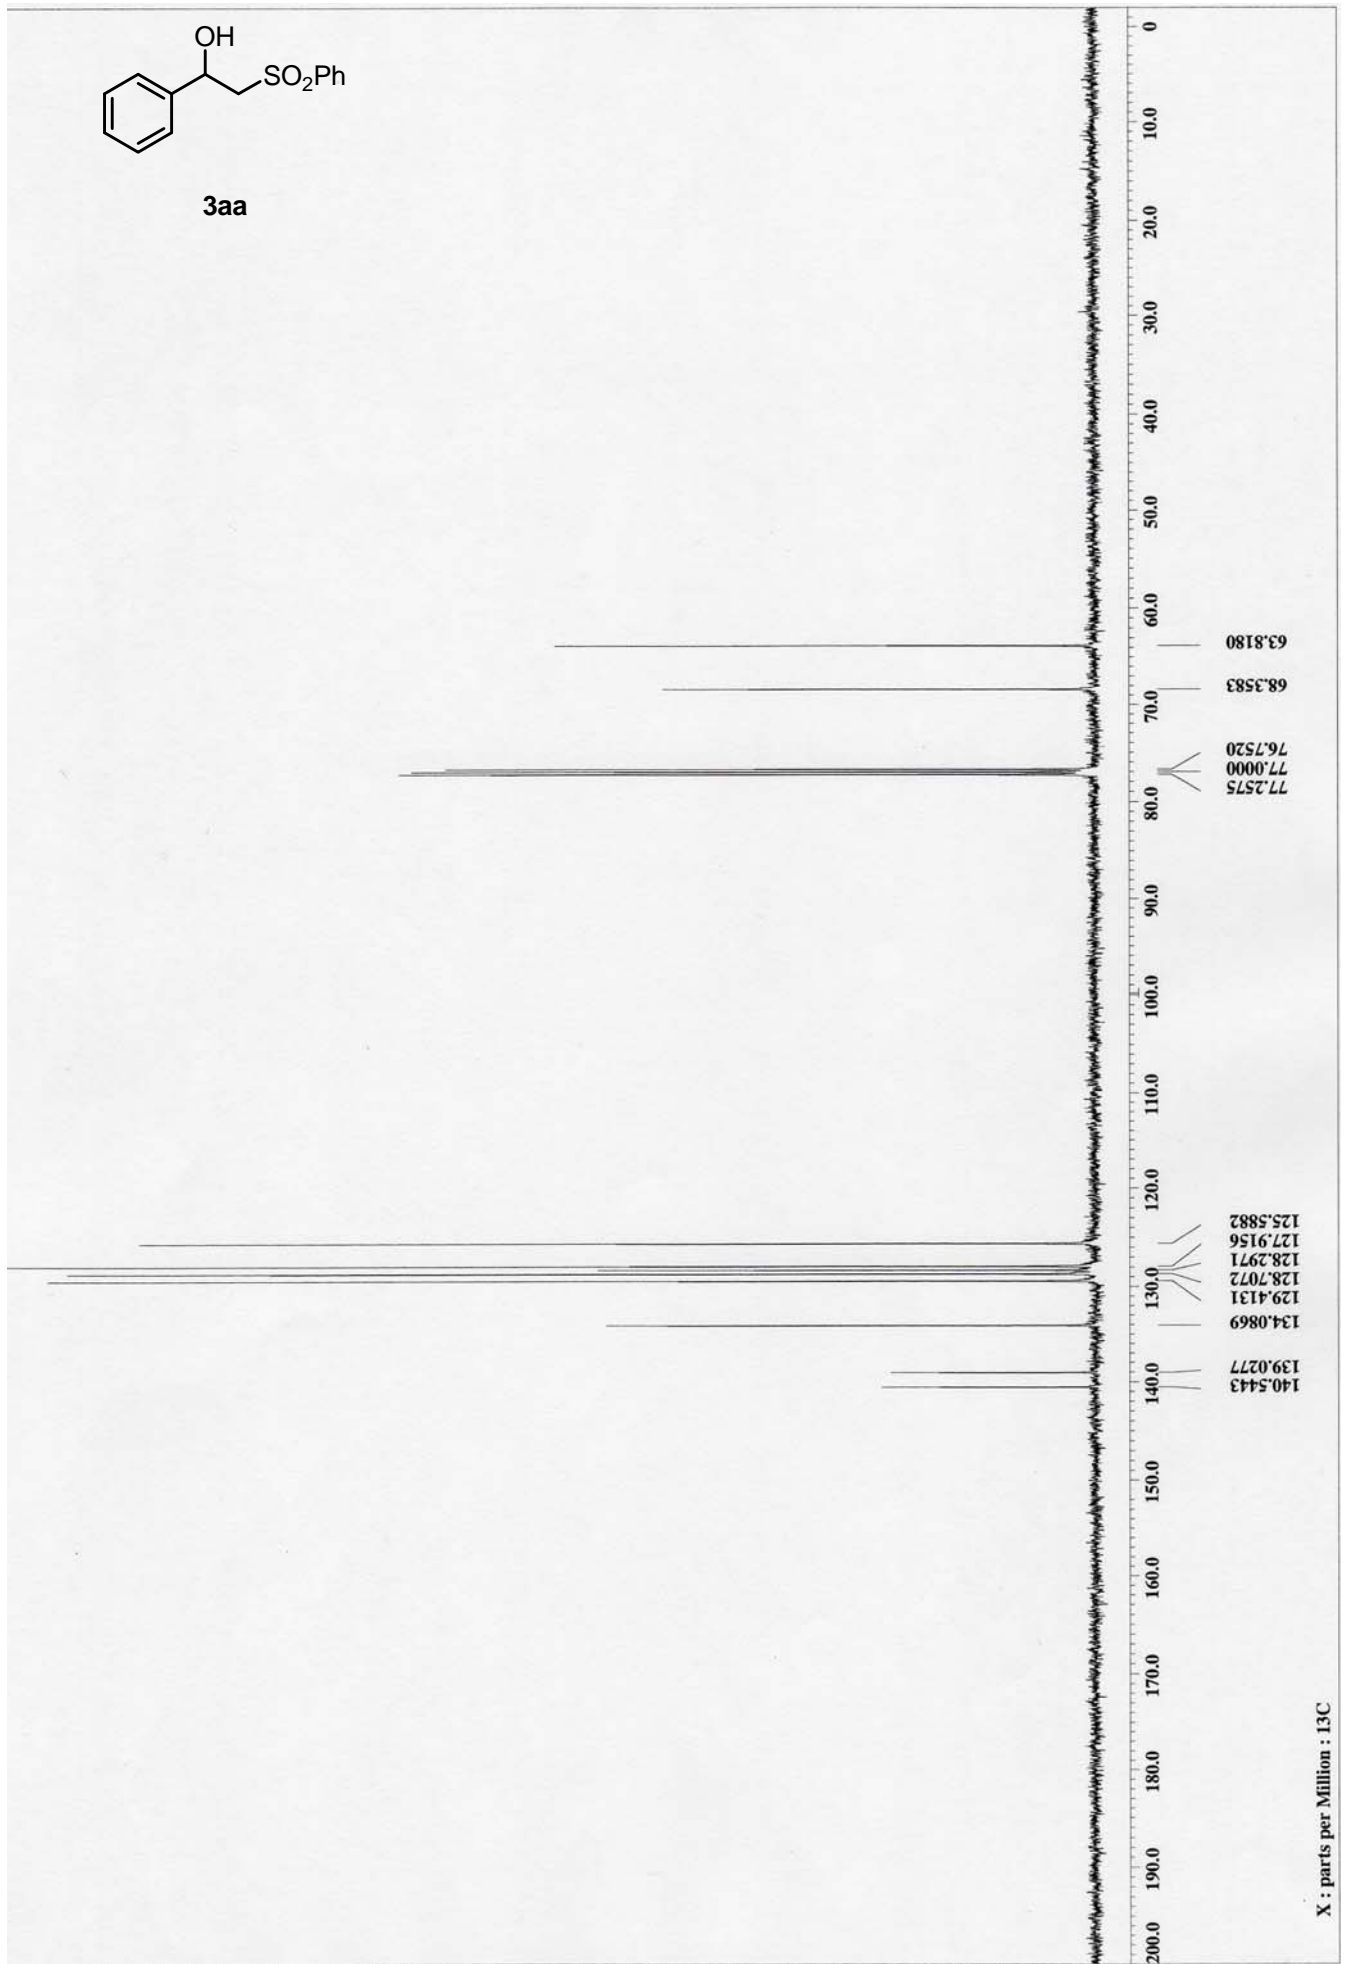

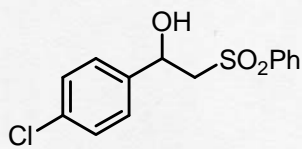

3ba

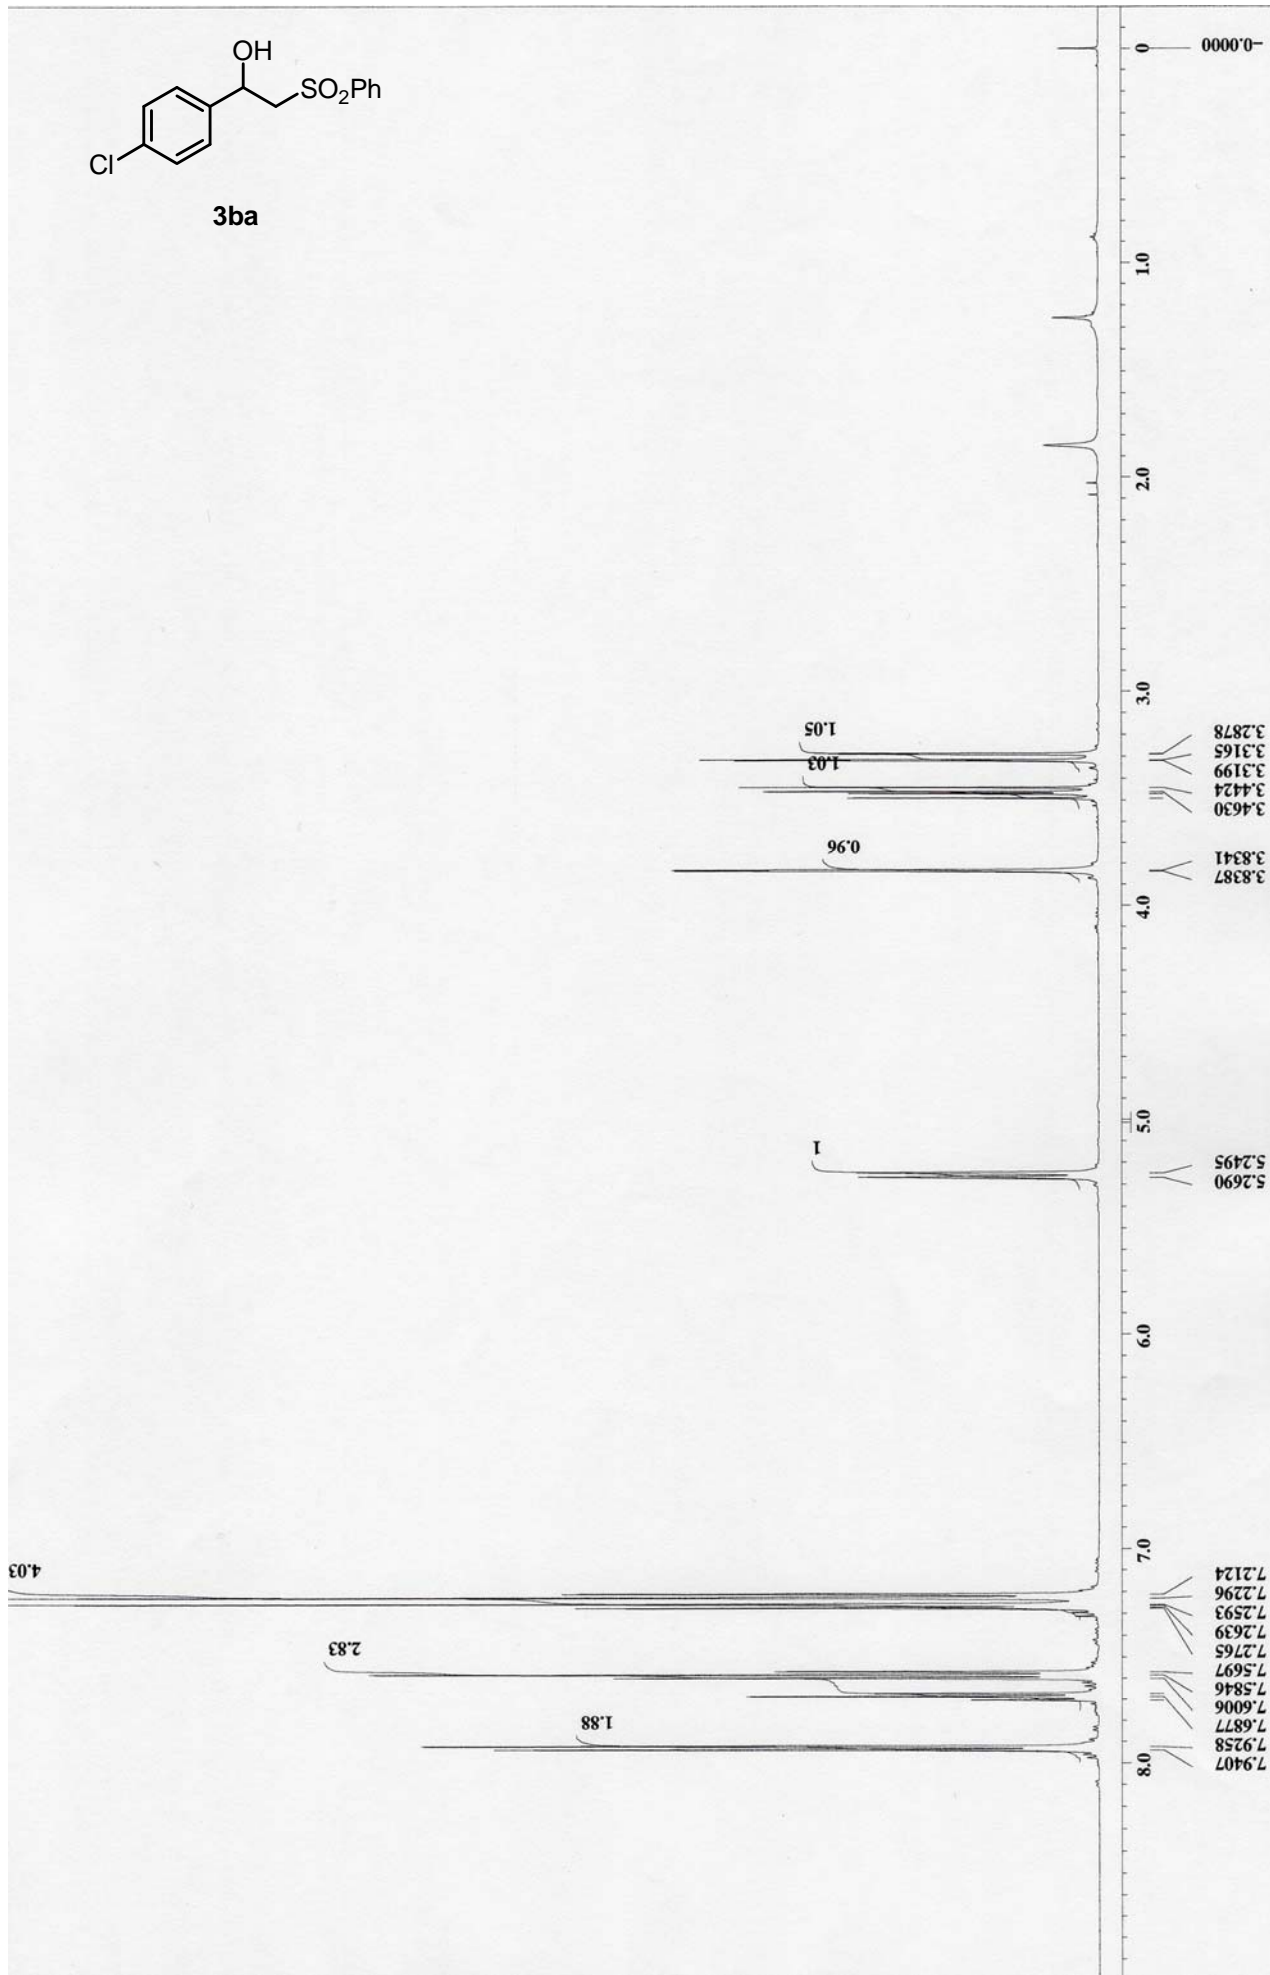



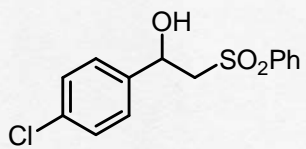

3ba

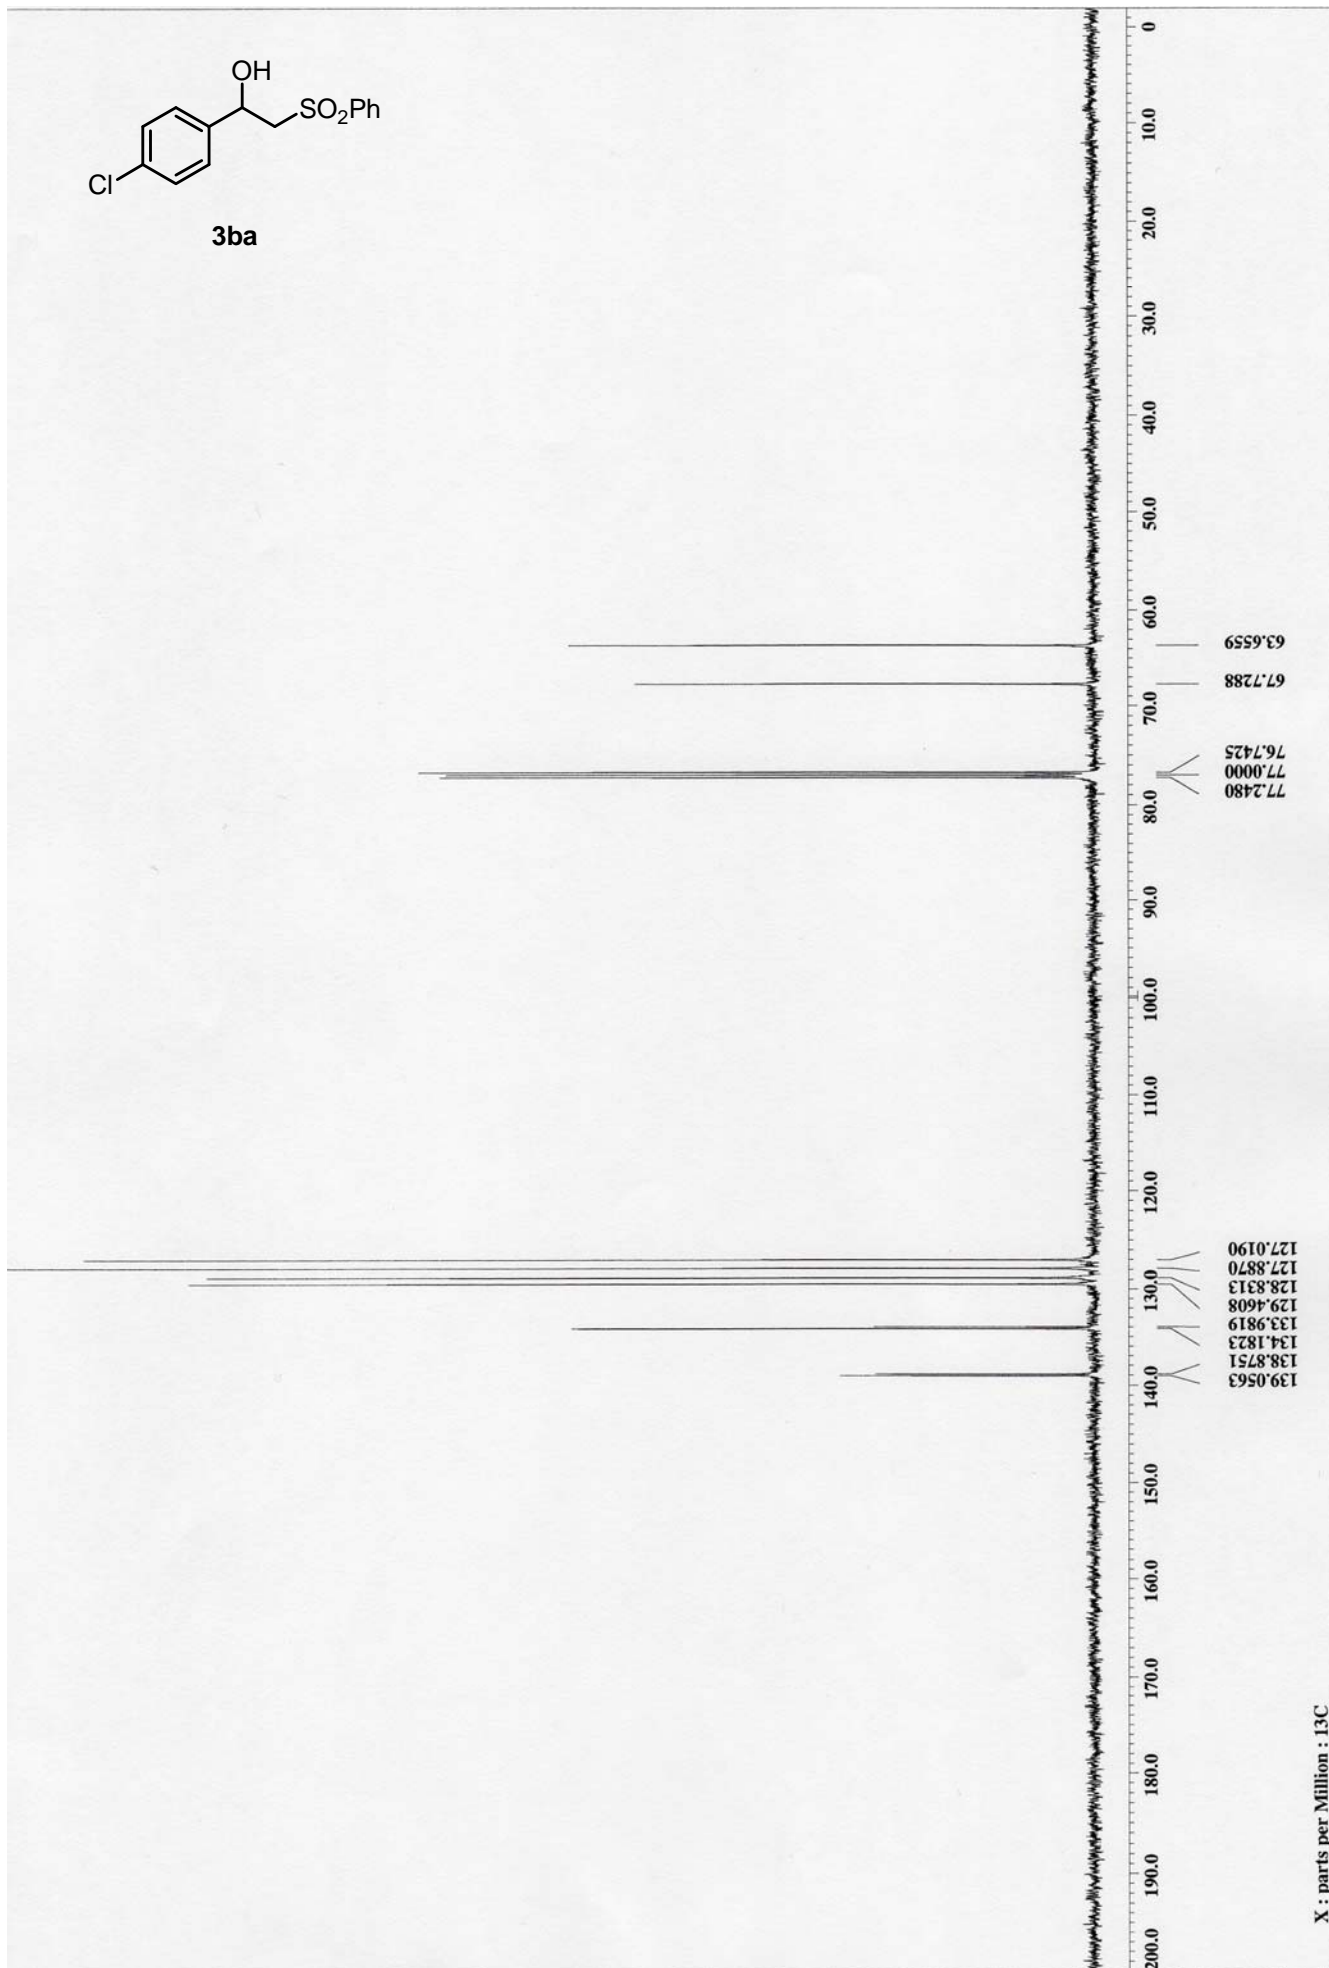

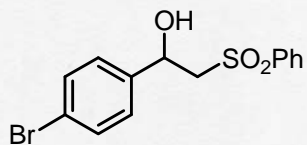

3ca

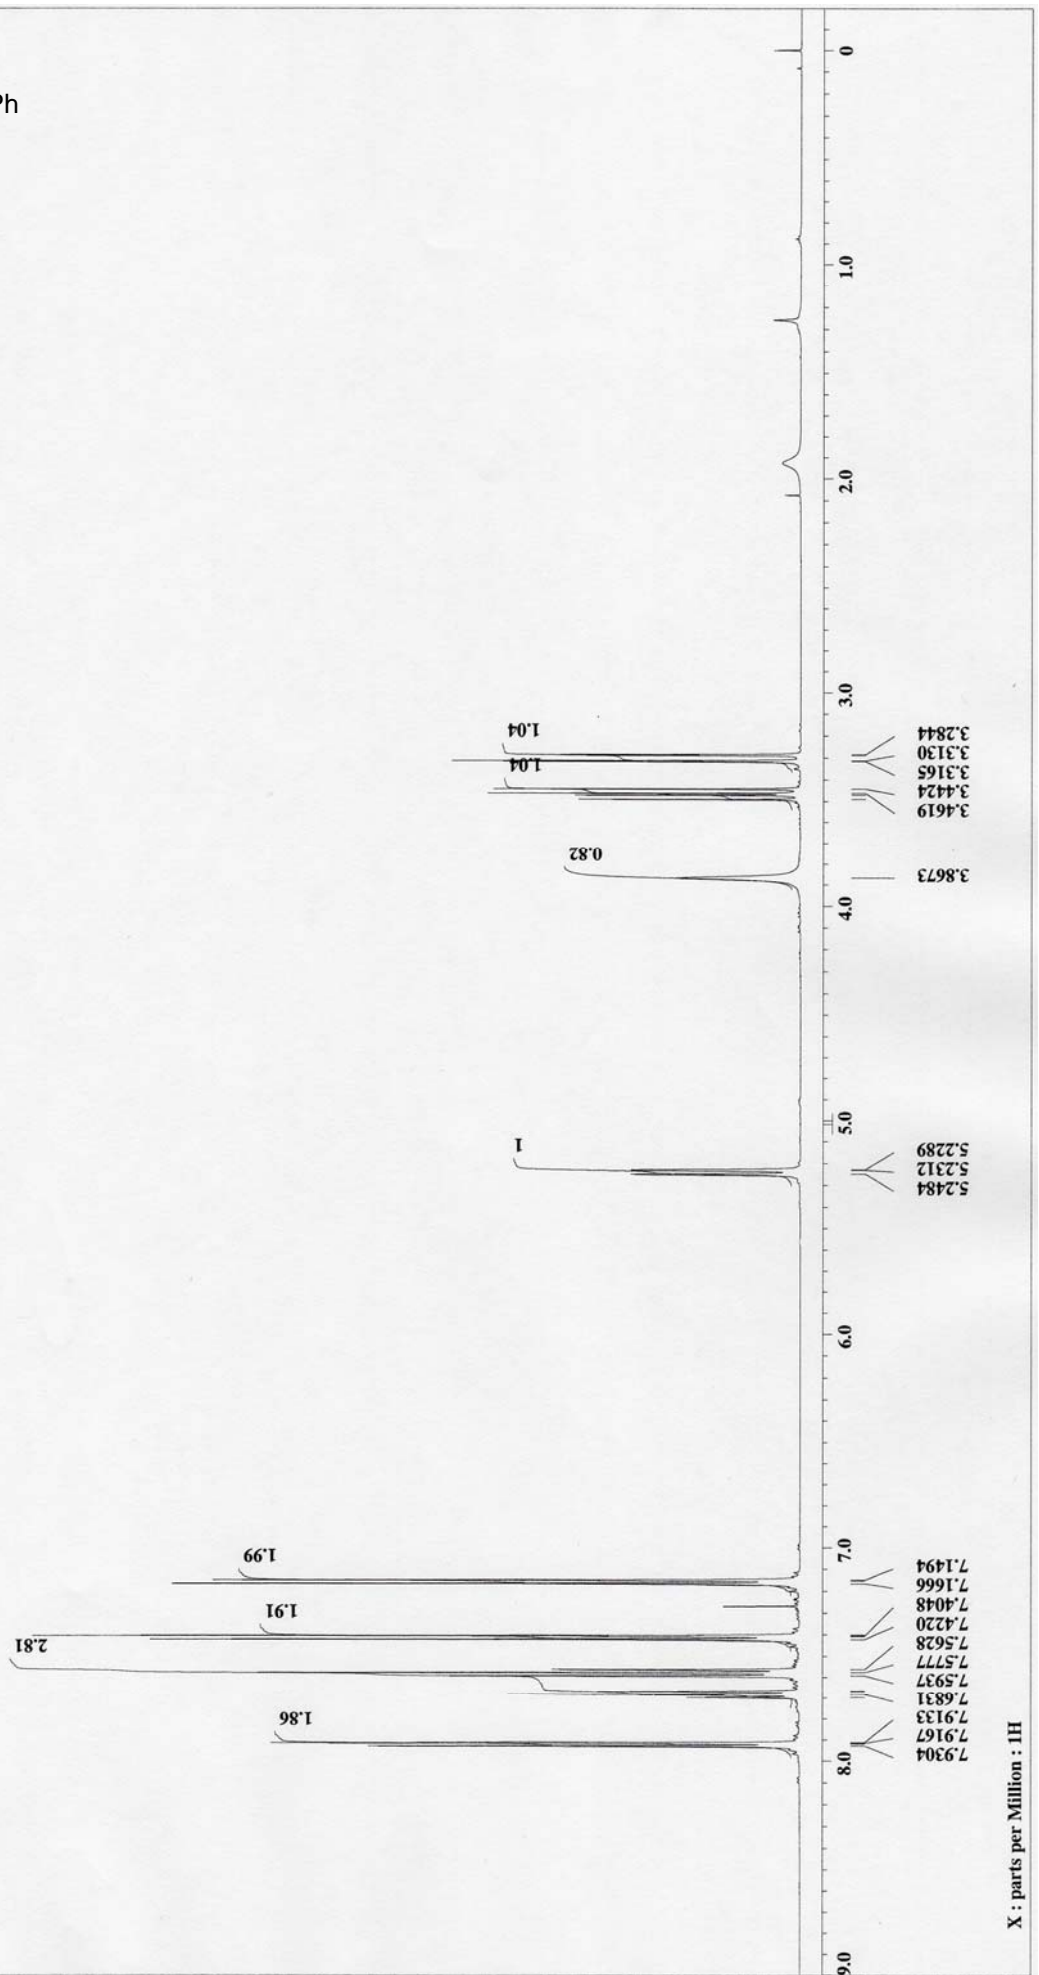

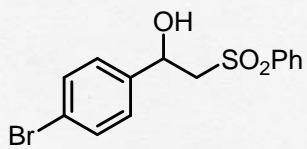

3ca

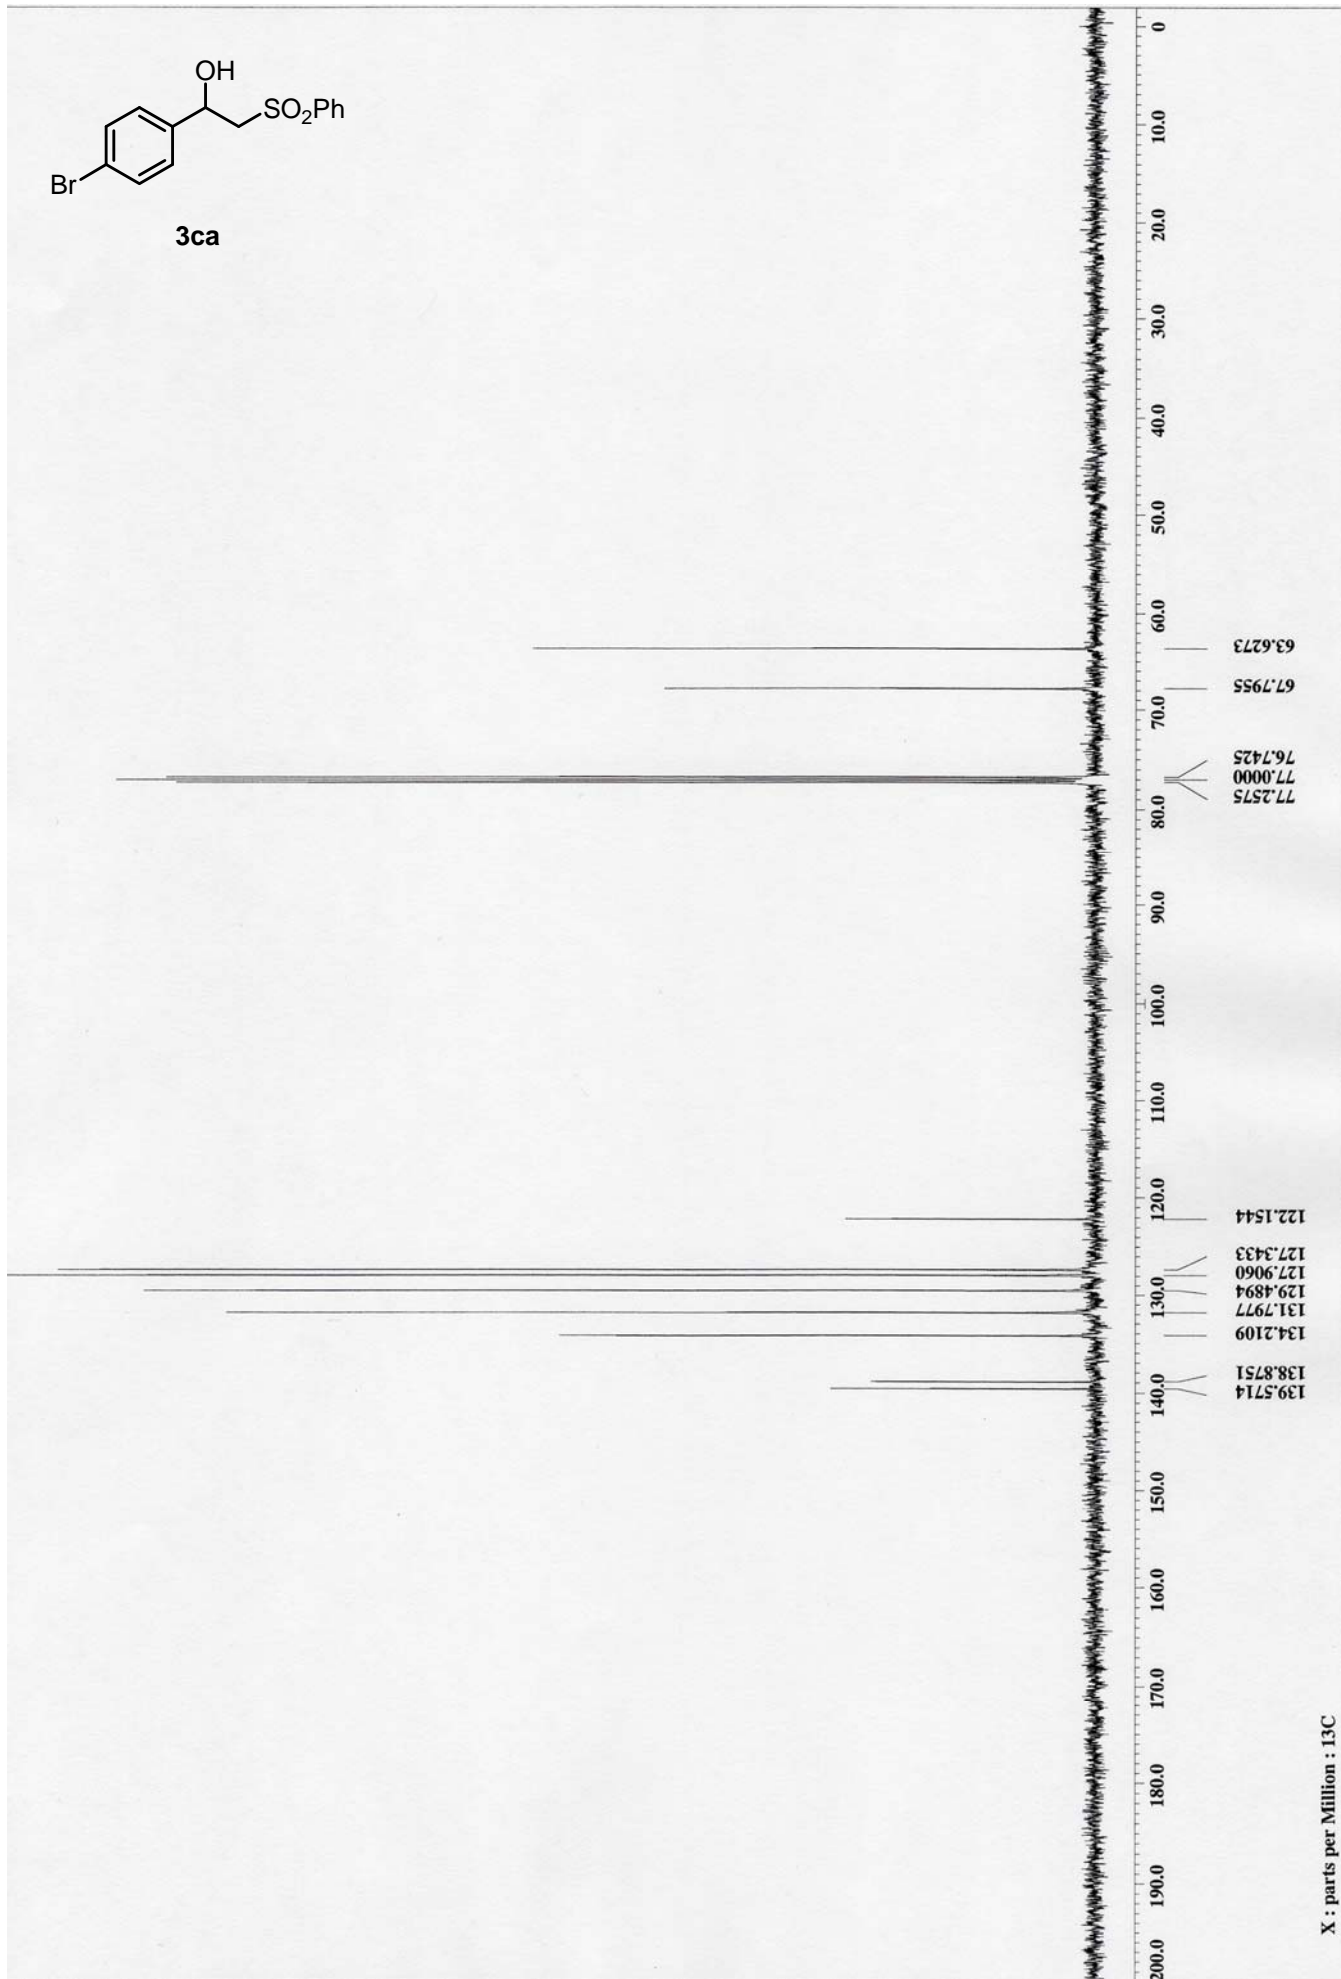

X : parts per Million : 13C

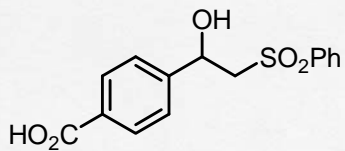

**3da**

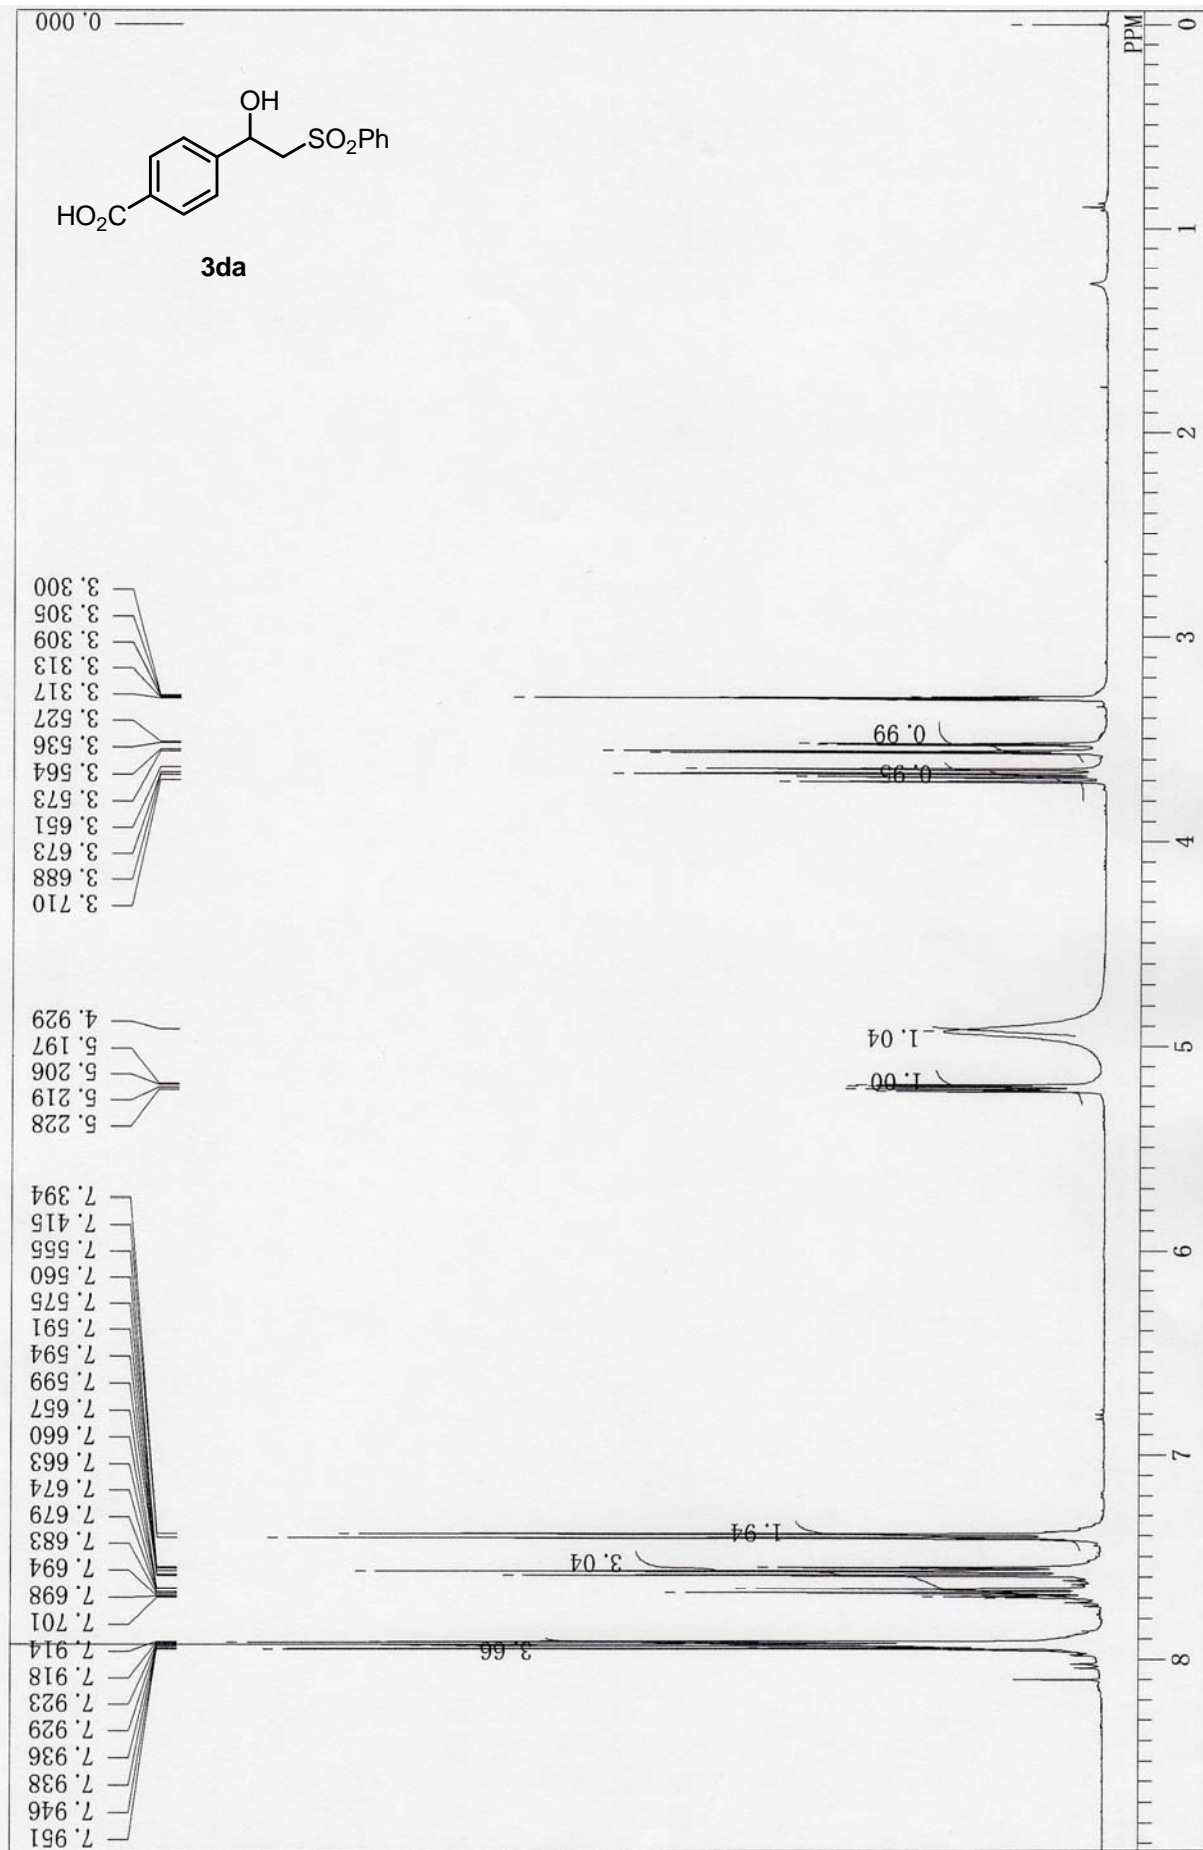

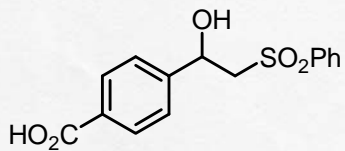

3da

48.350  
48.564  
48.786  
49.000  
49.066  
49.165  
49.214  
49.280  
49.428  
49.642  
64.292  
69.559

127.170  
129.260  
130.239  
131.013  
134.815  
141.482  
148.815  
169.407

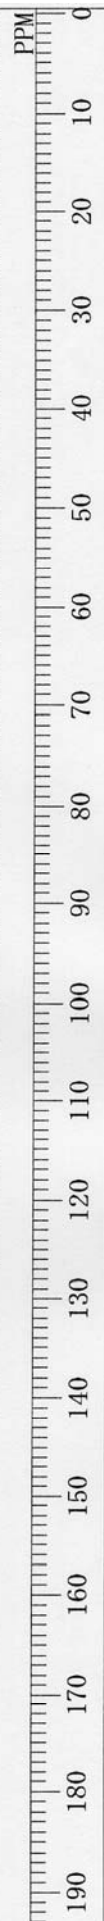

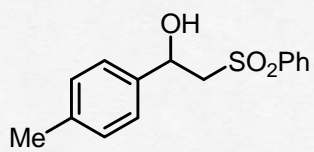

3ea

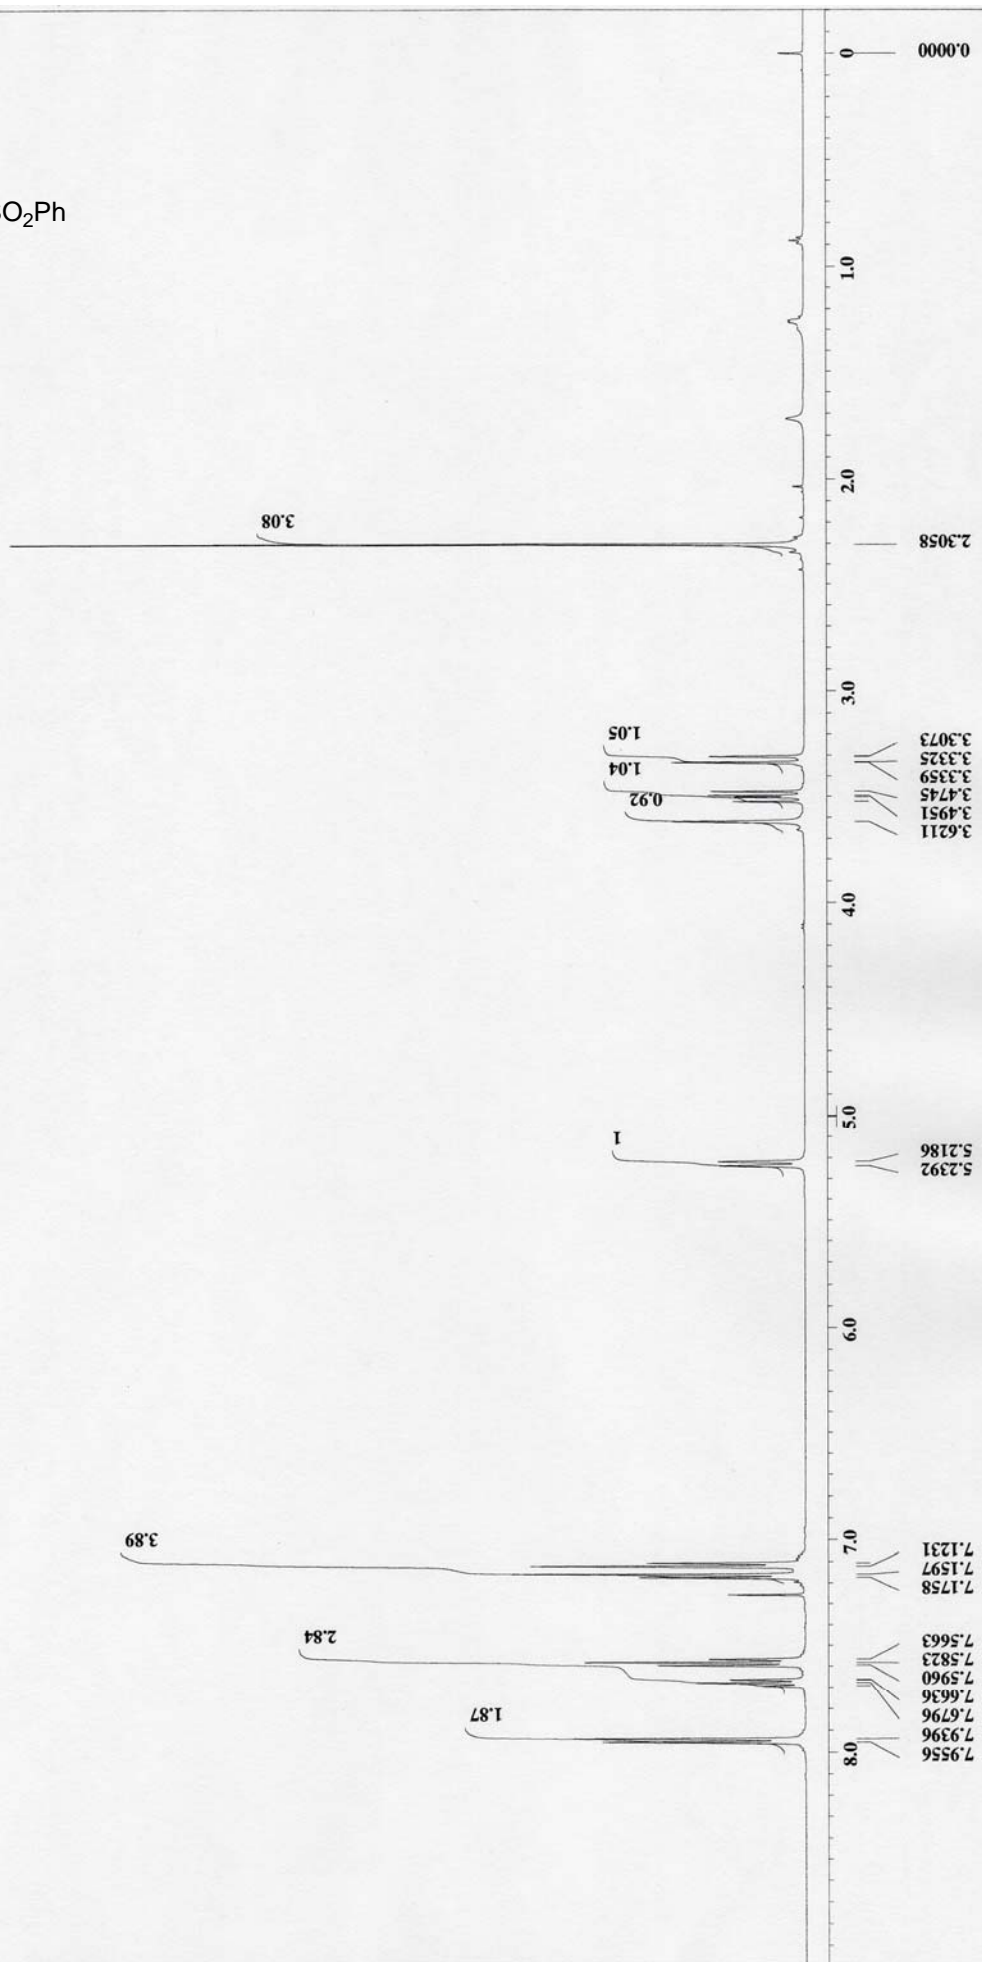

X : parts per Million : 1H

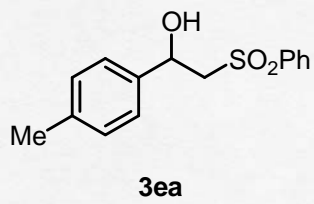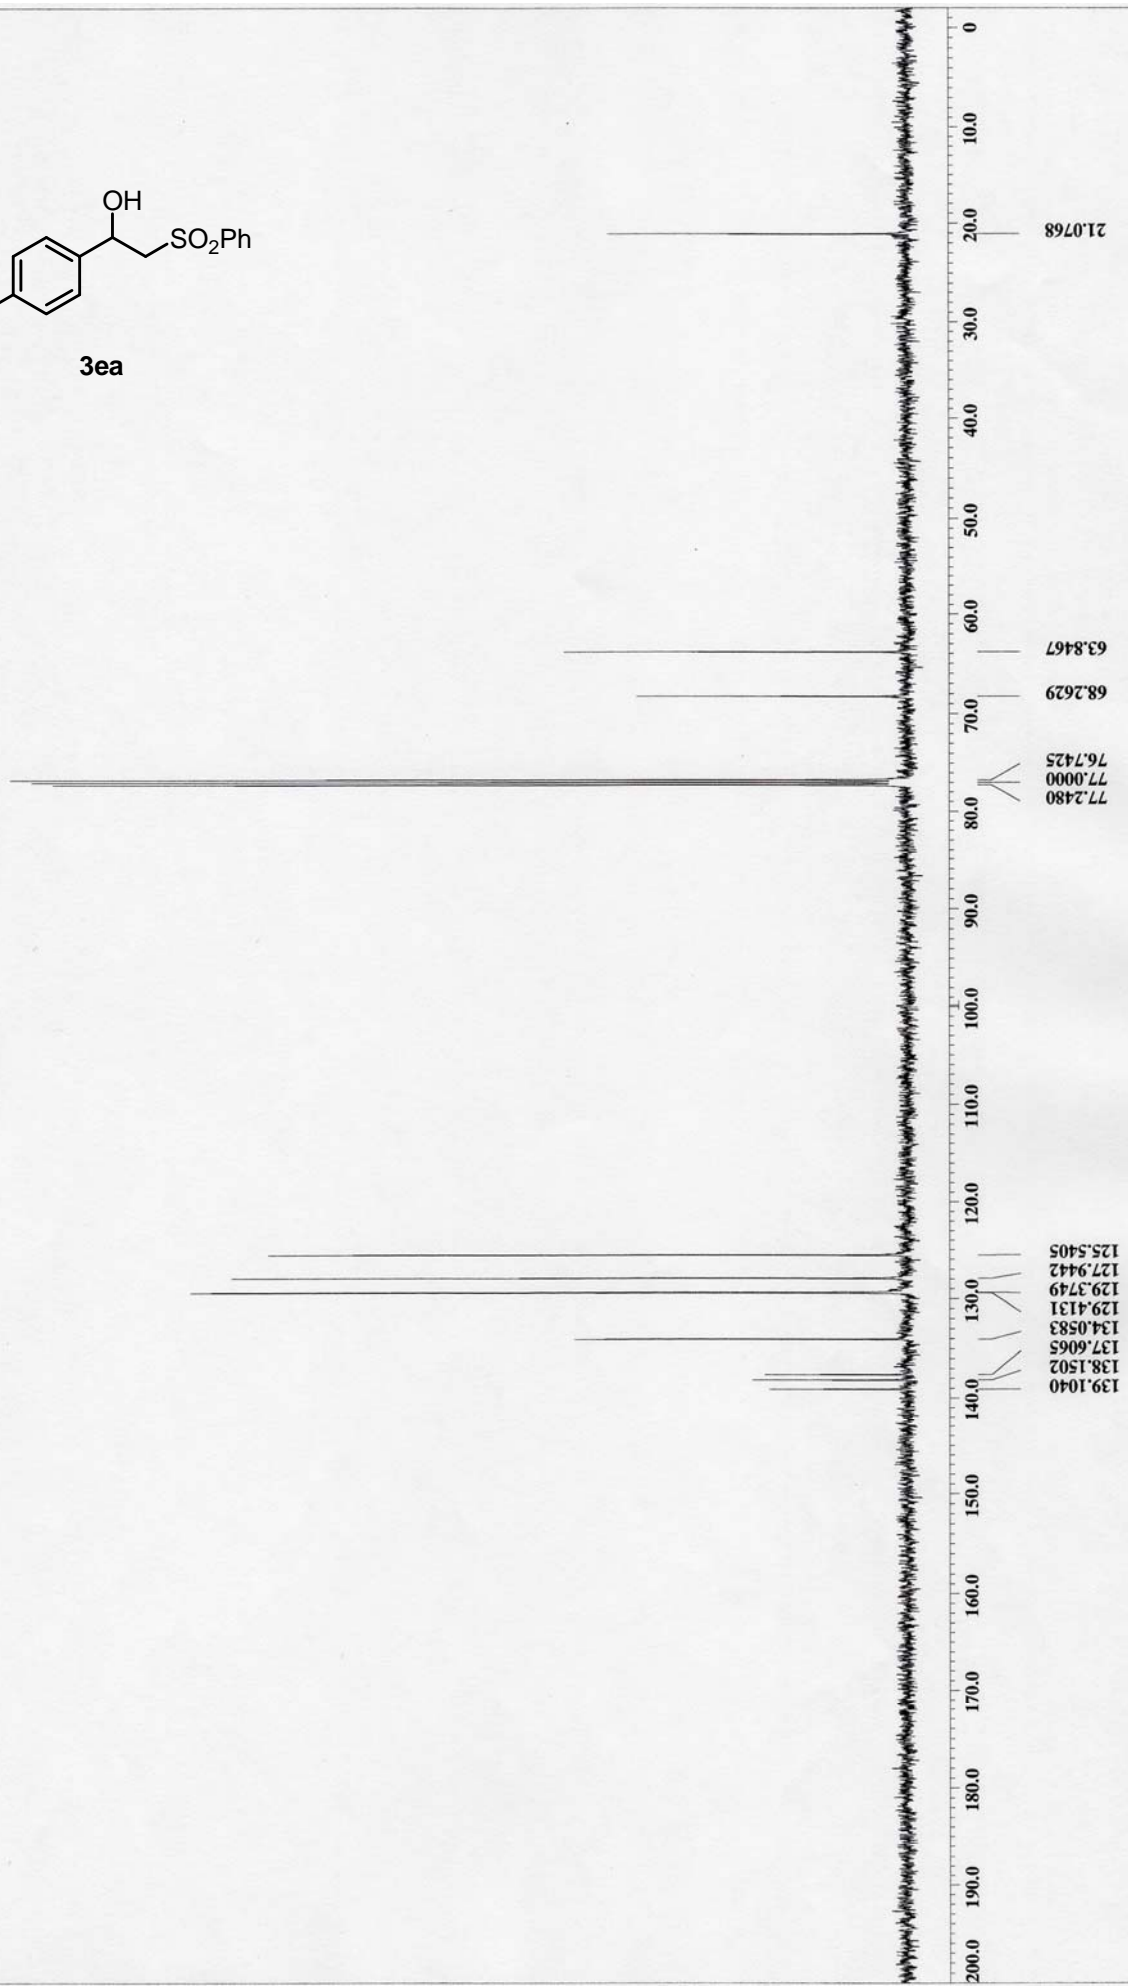

X : parts per Million : 13C

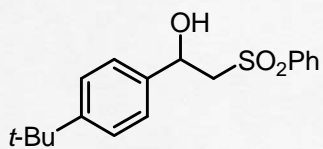

3fa

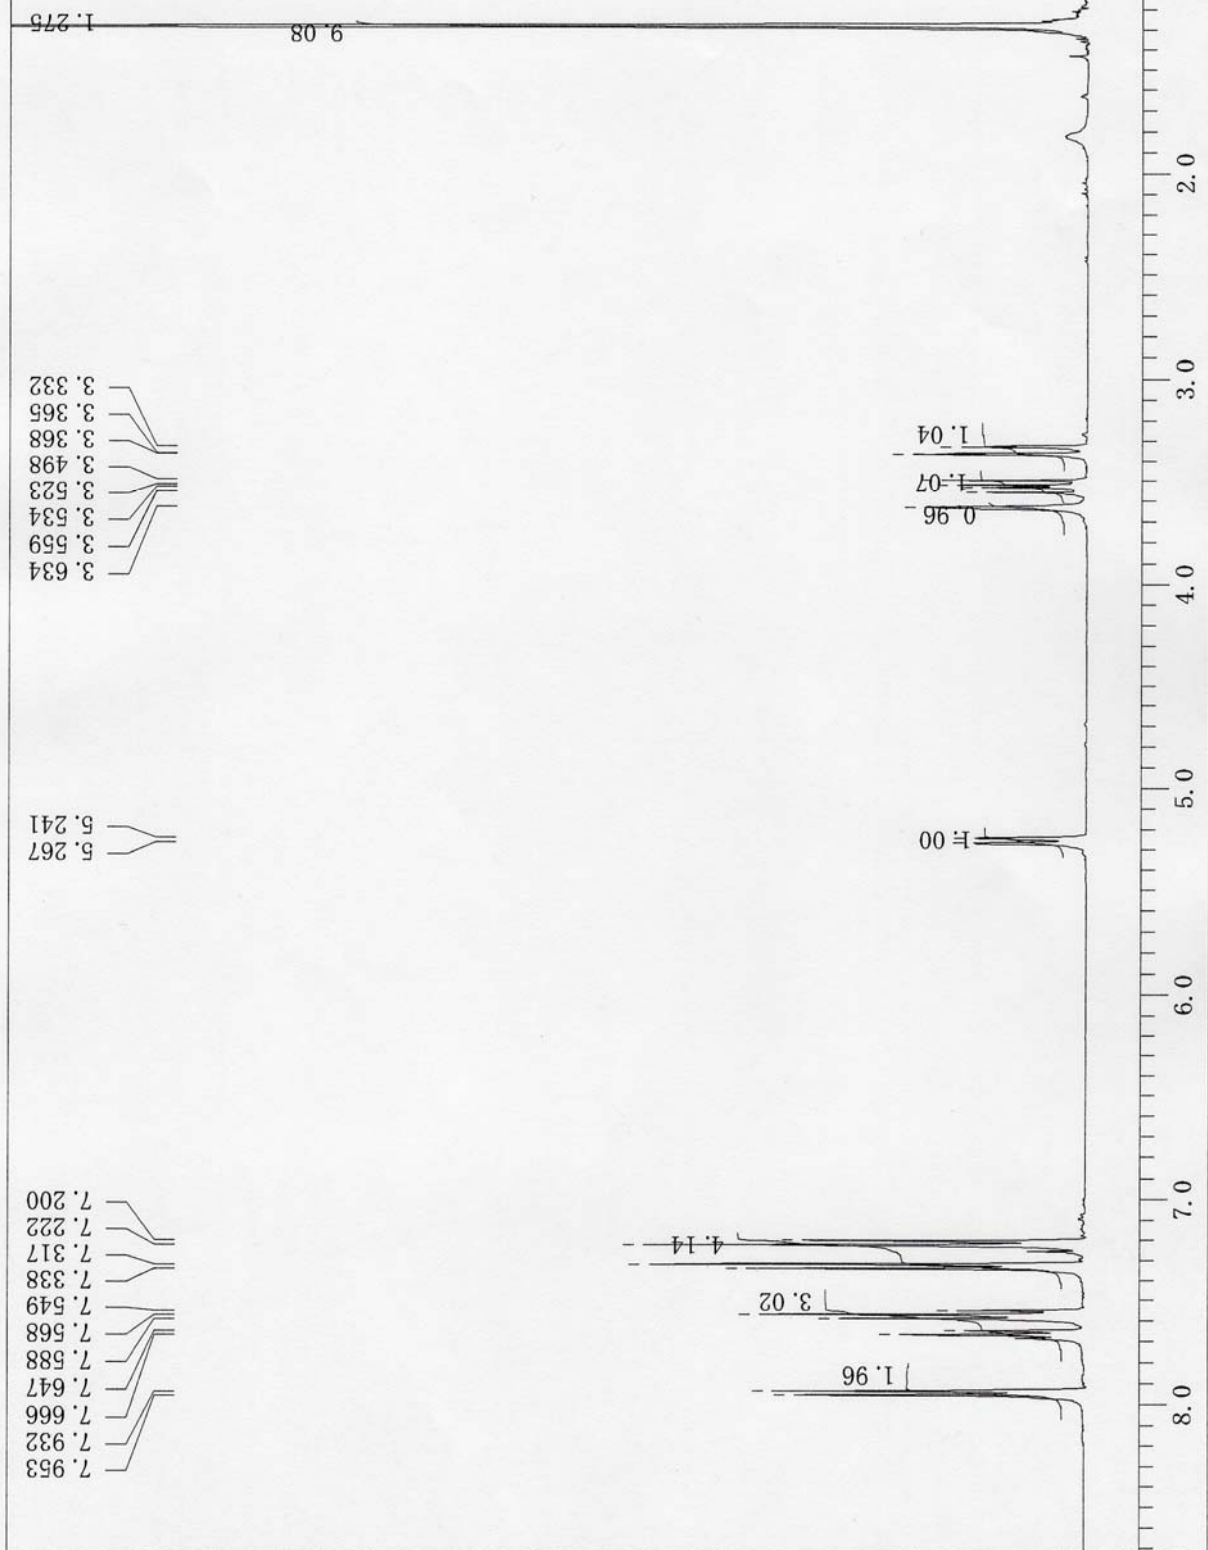



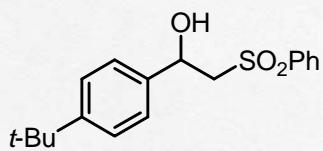

**3fa**

31.208  
34.500

63.774

68.218

76.679

77.000

77.321

125.377

125.632

127.920

129.376

134.010

137.565

139.178

151.400

PPM

0  
10  
20  
30  
40  
50  
60  
70  
80  
90  
100  
110  
120  
130  
140  
150  
160  
170  
180  
190

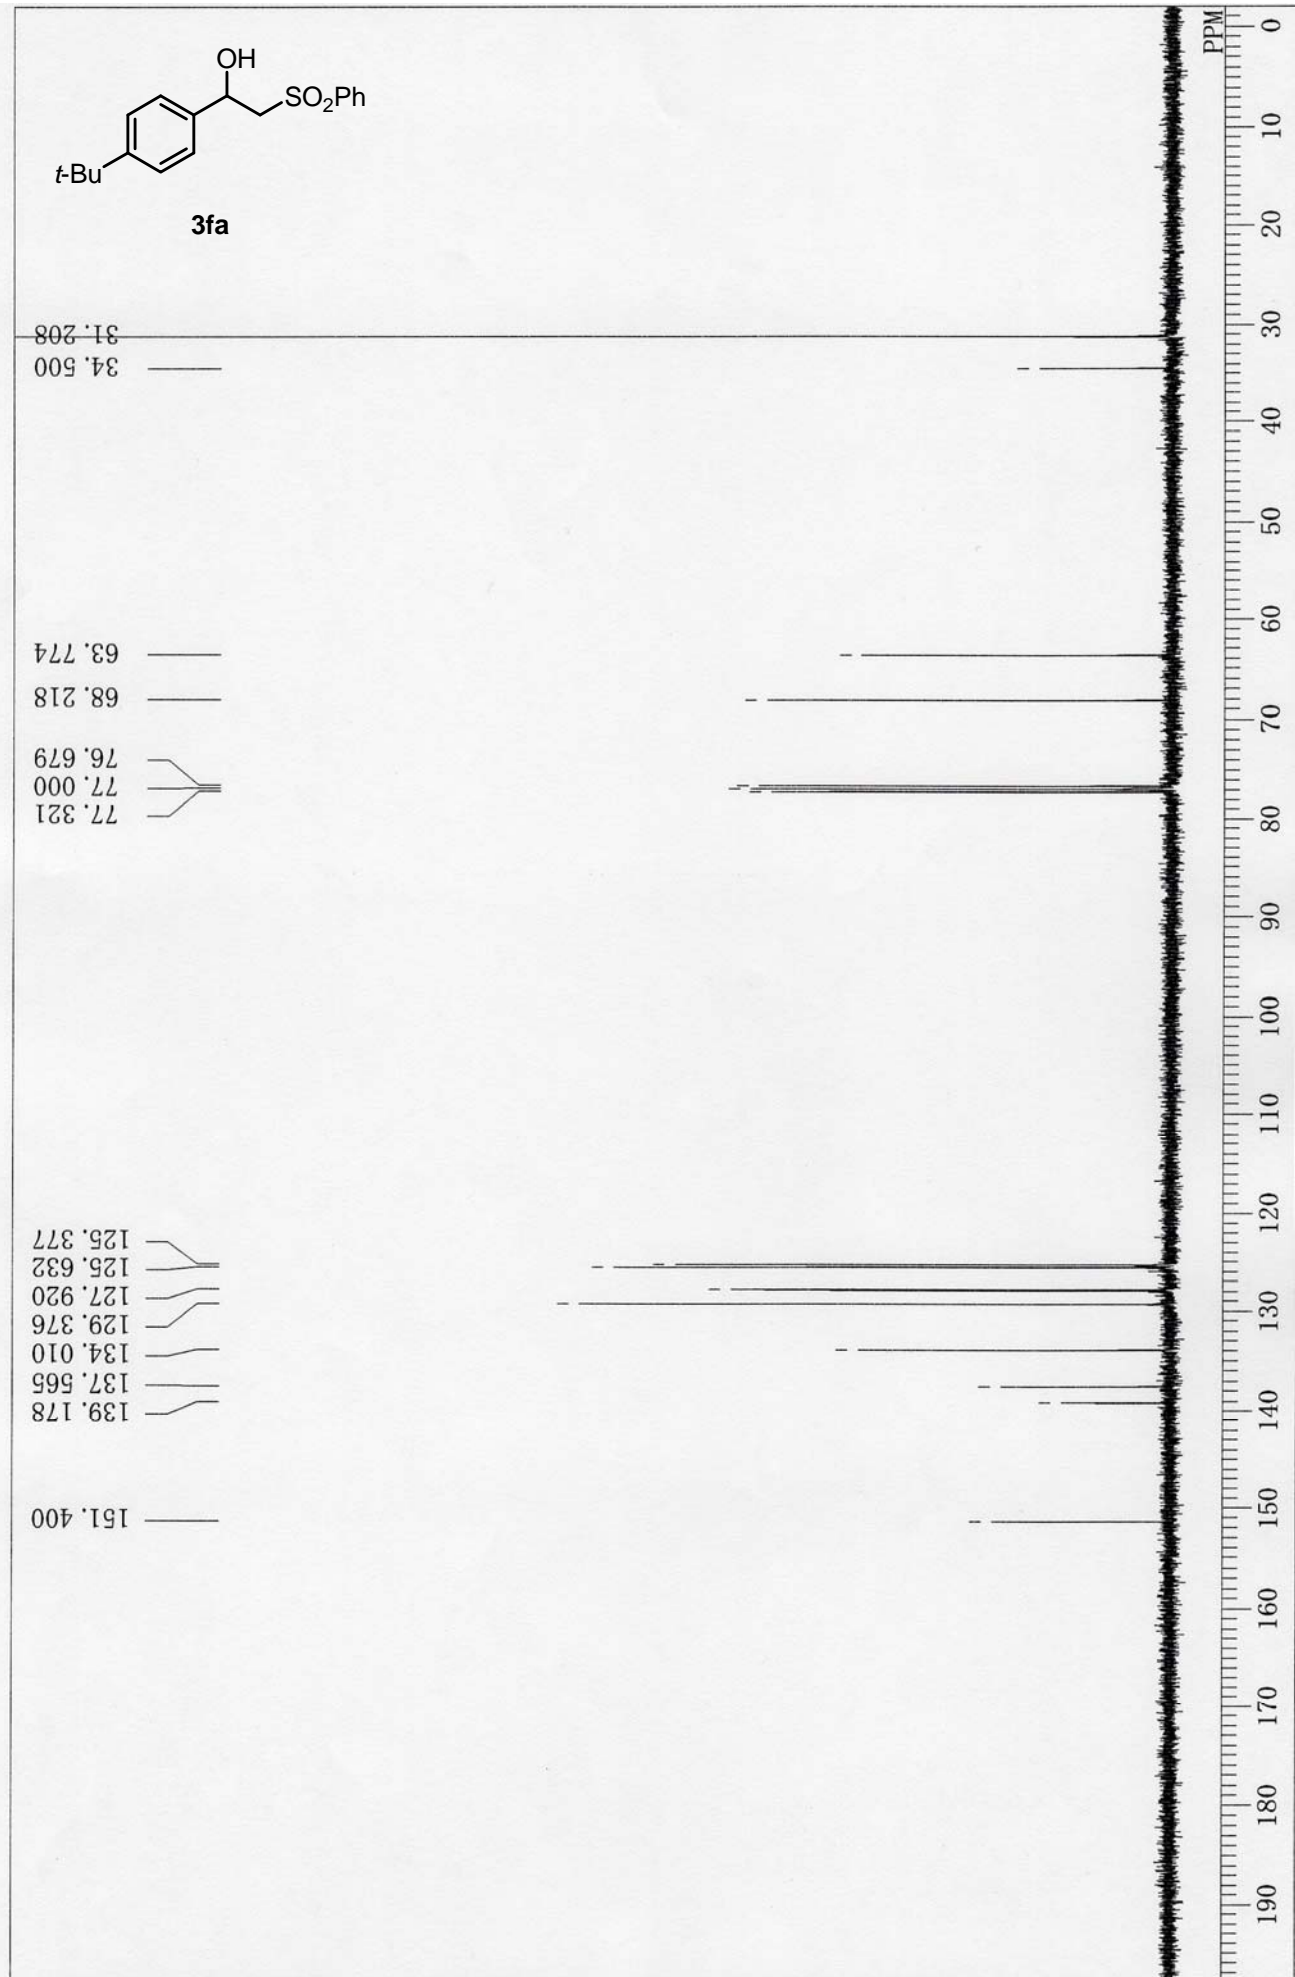

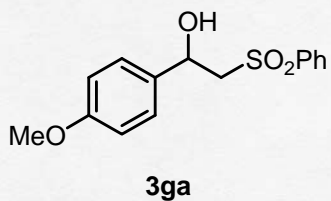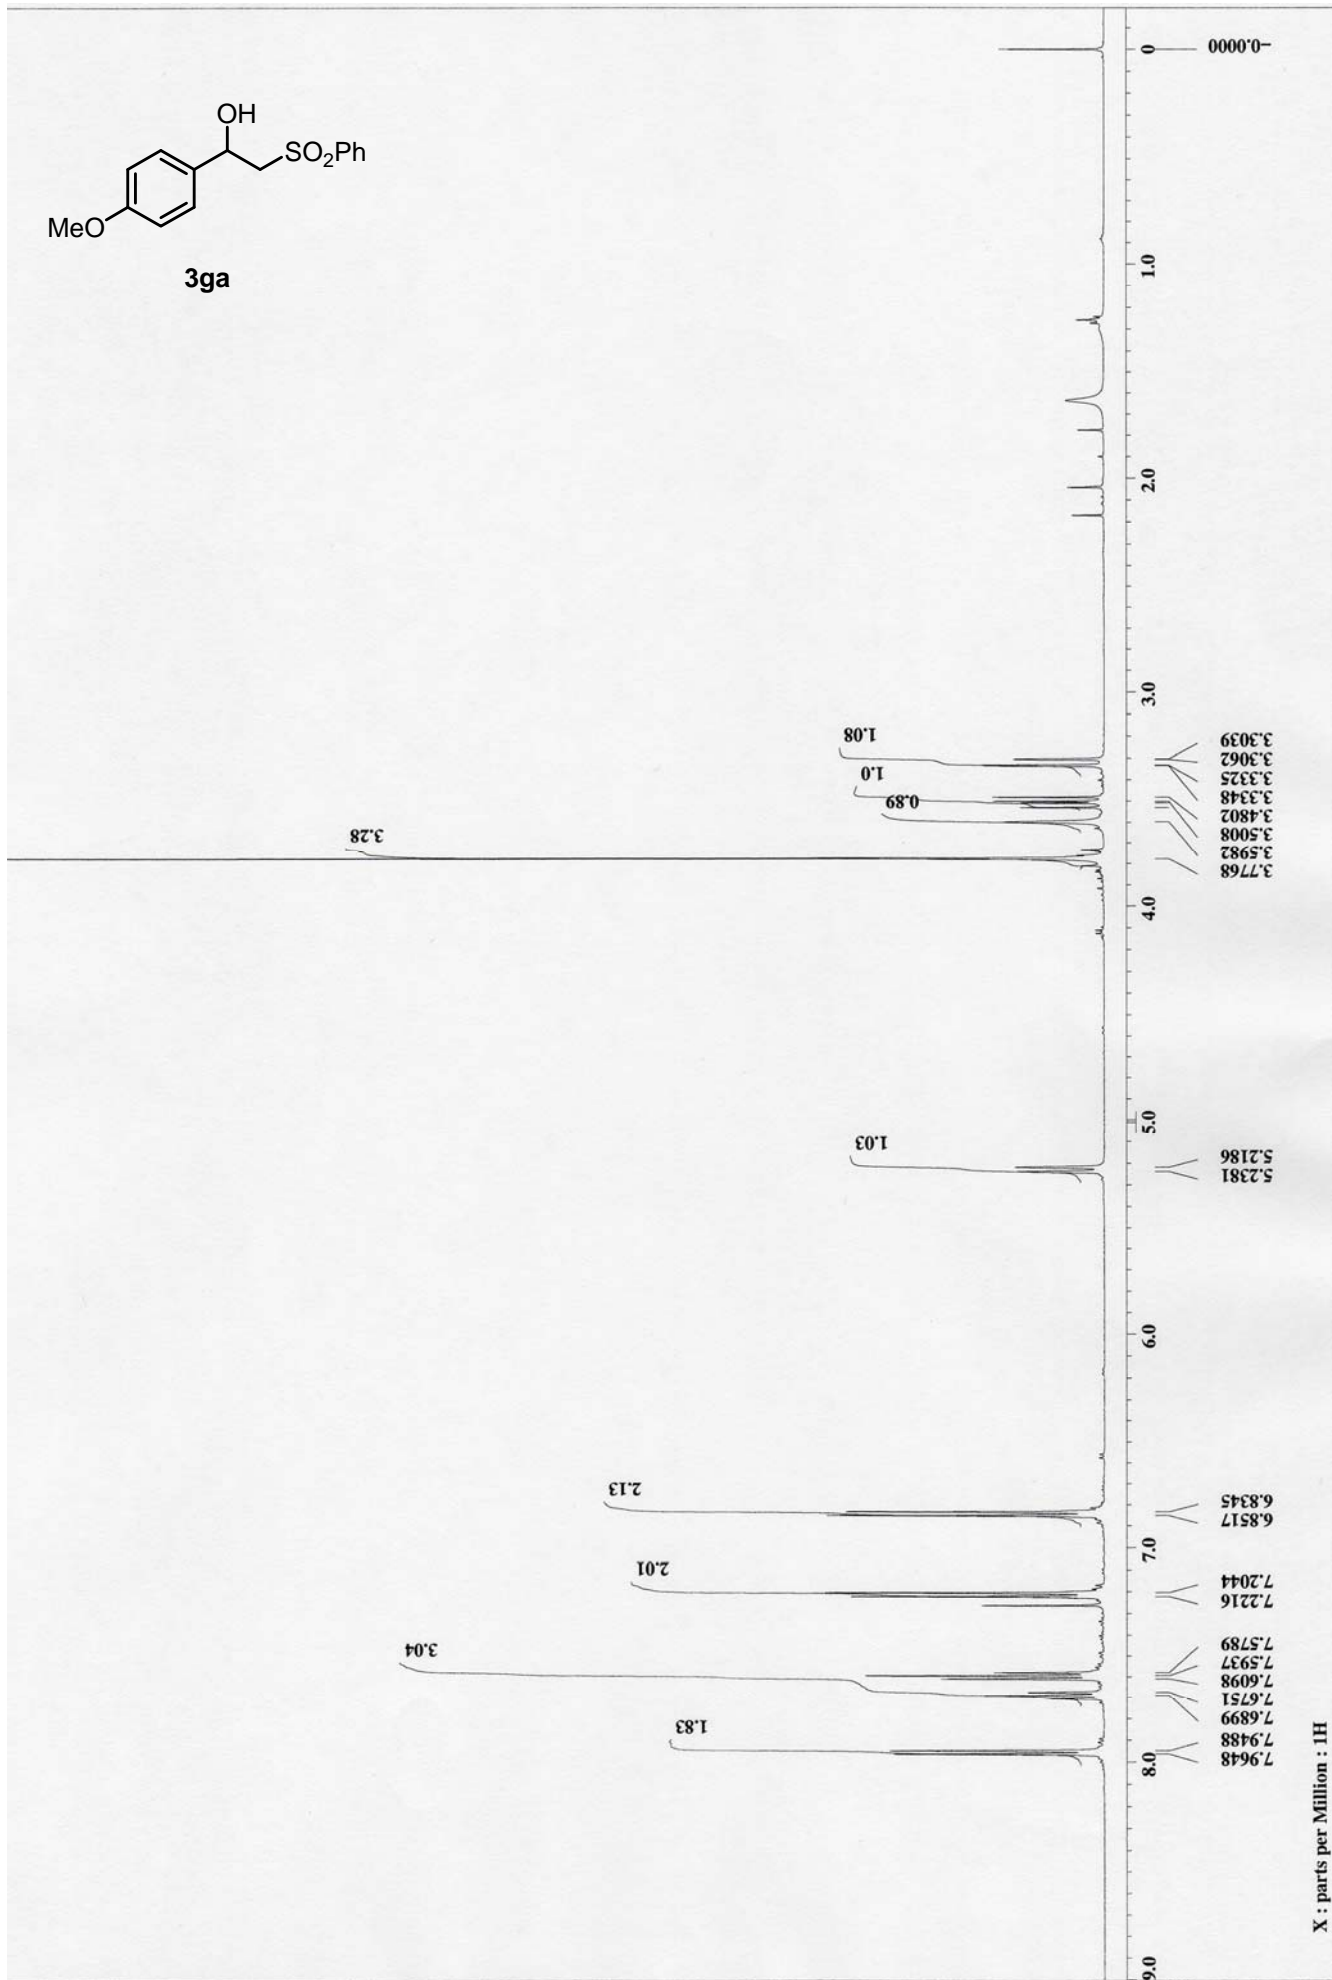

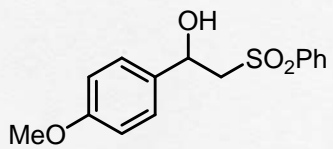

3ga

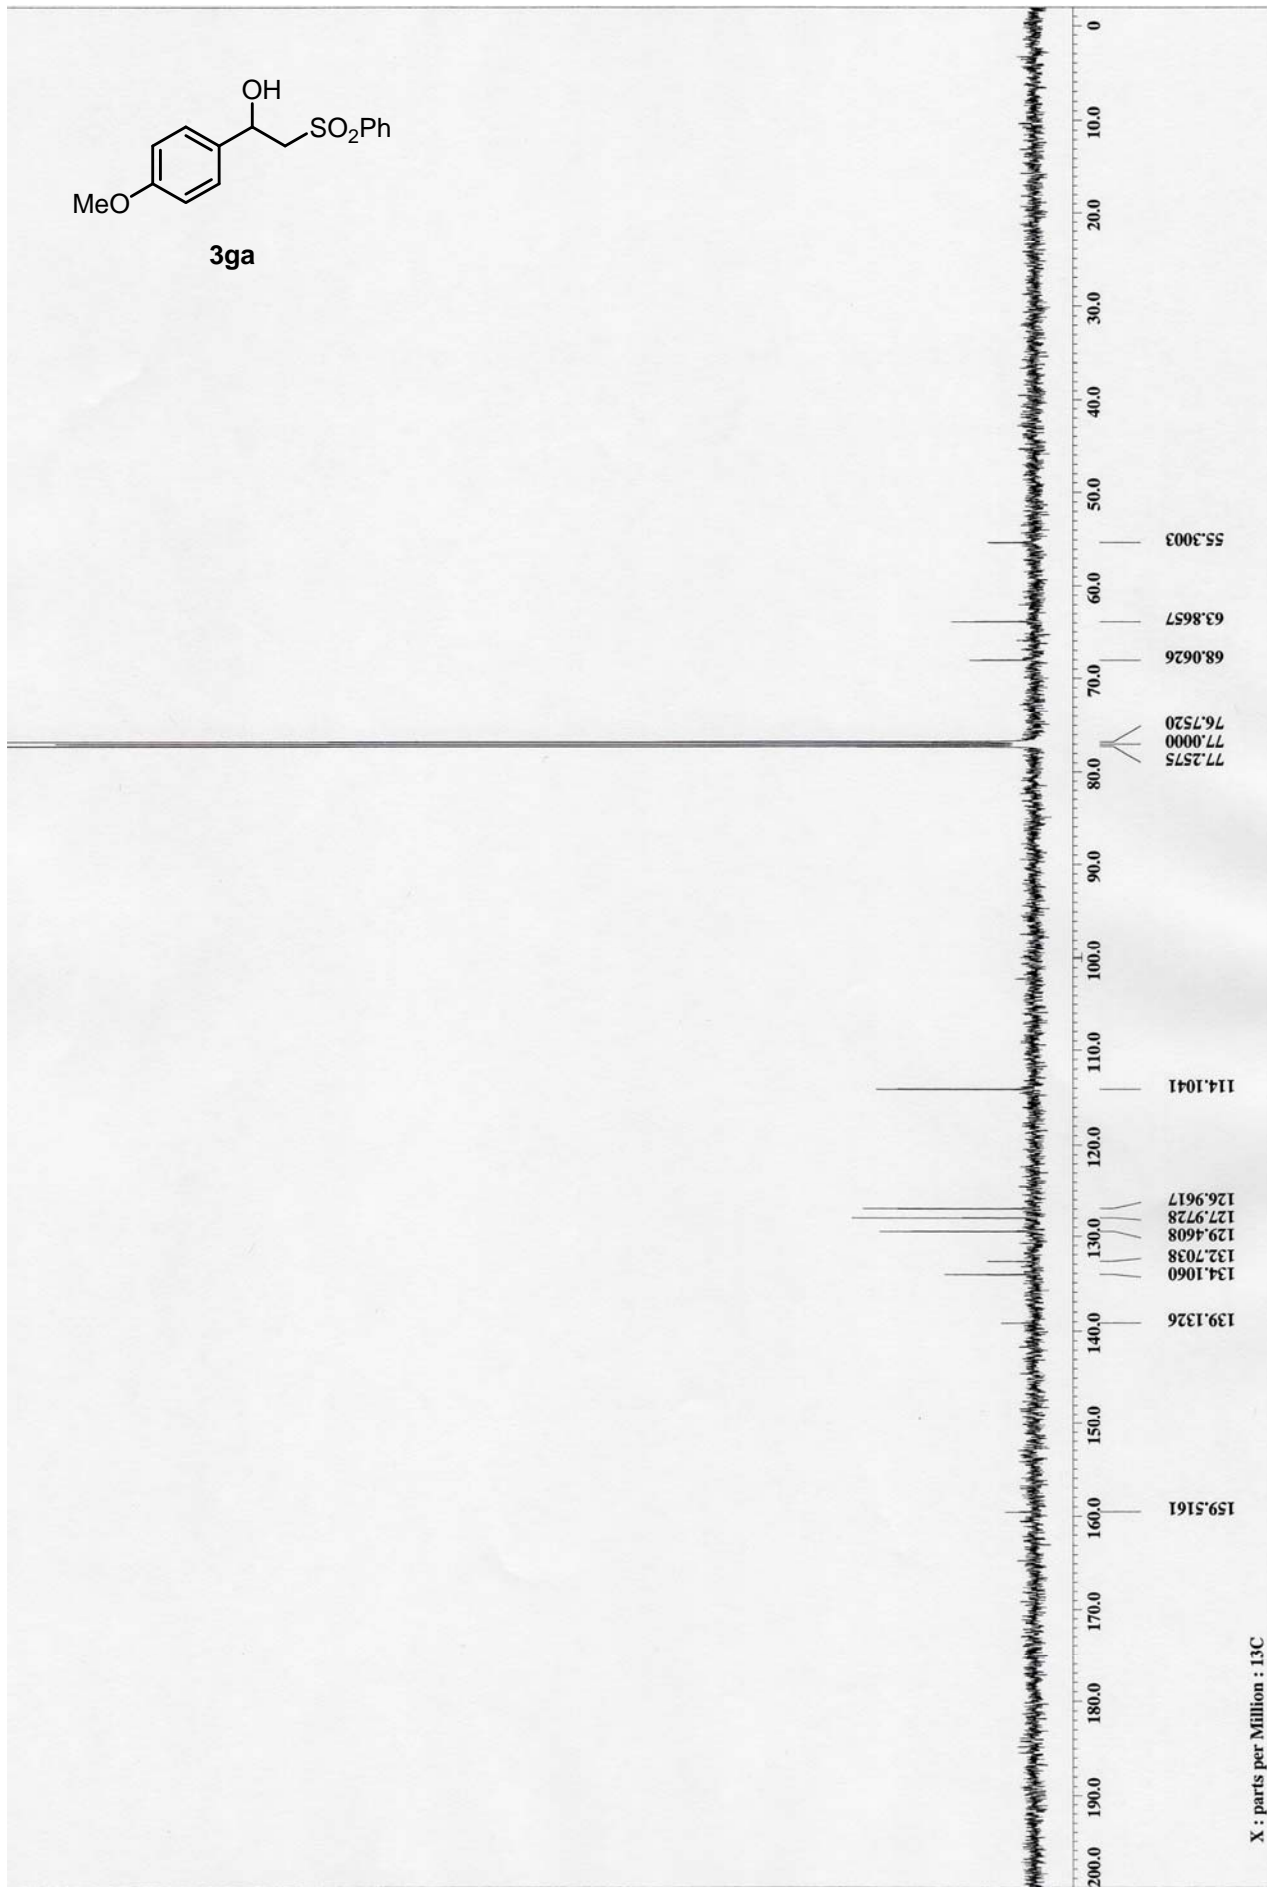

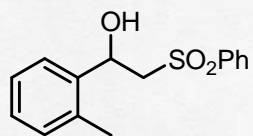

3ha

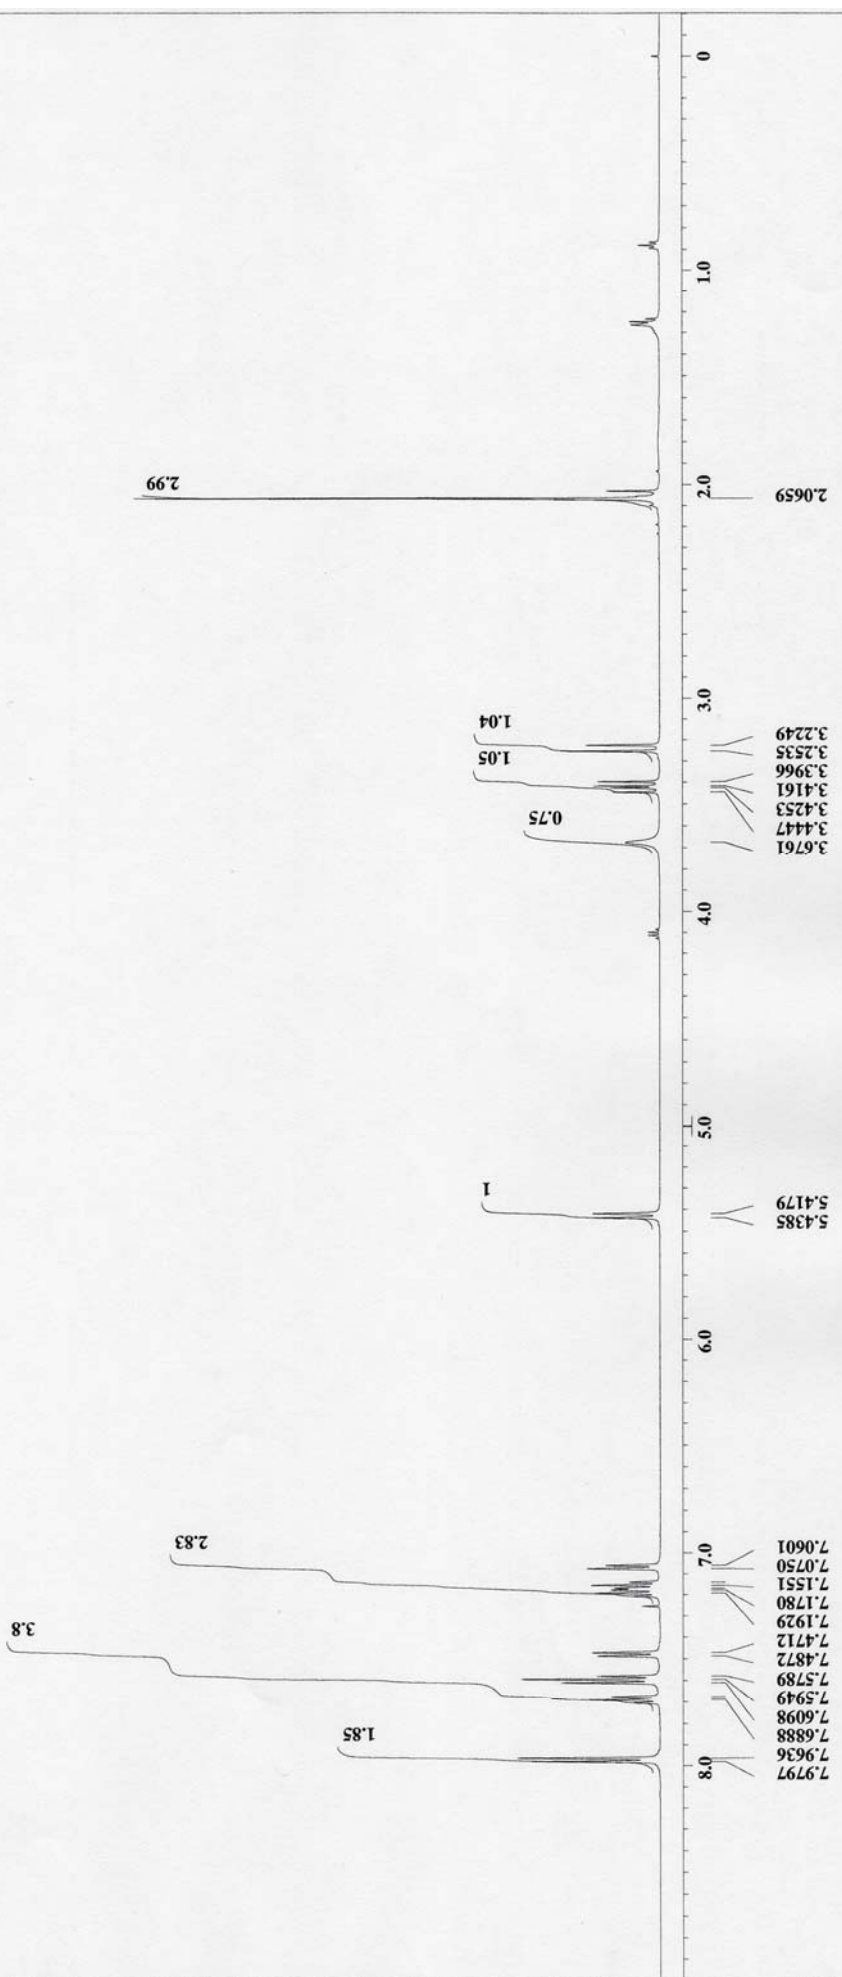

X : parts per Million : 1H

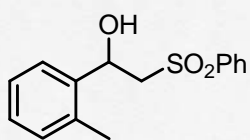

3ha

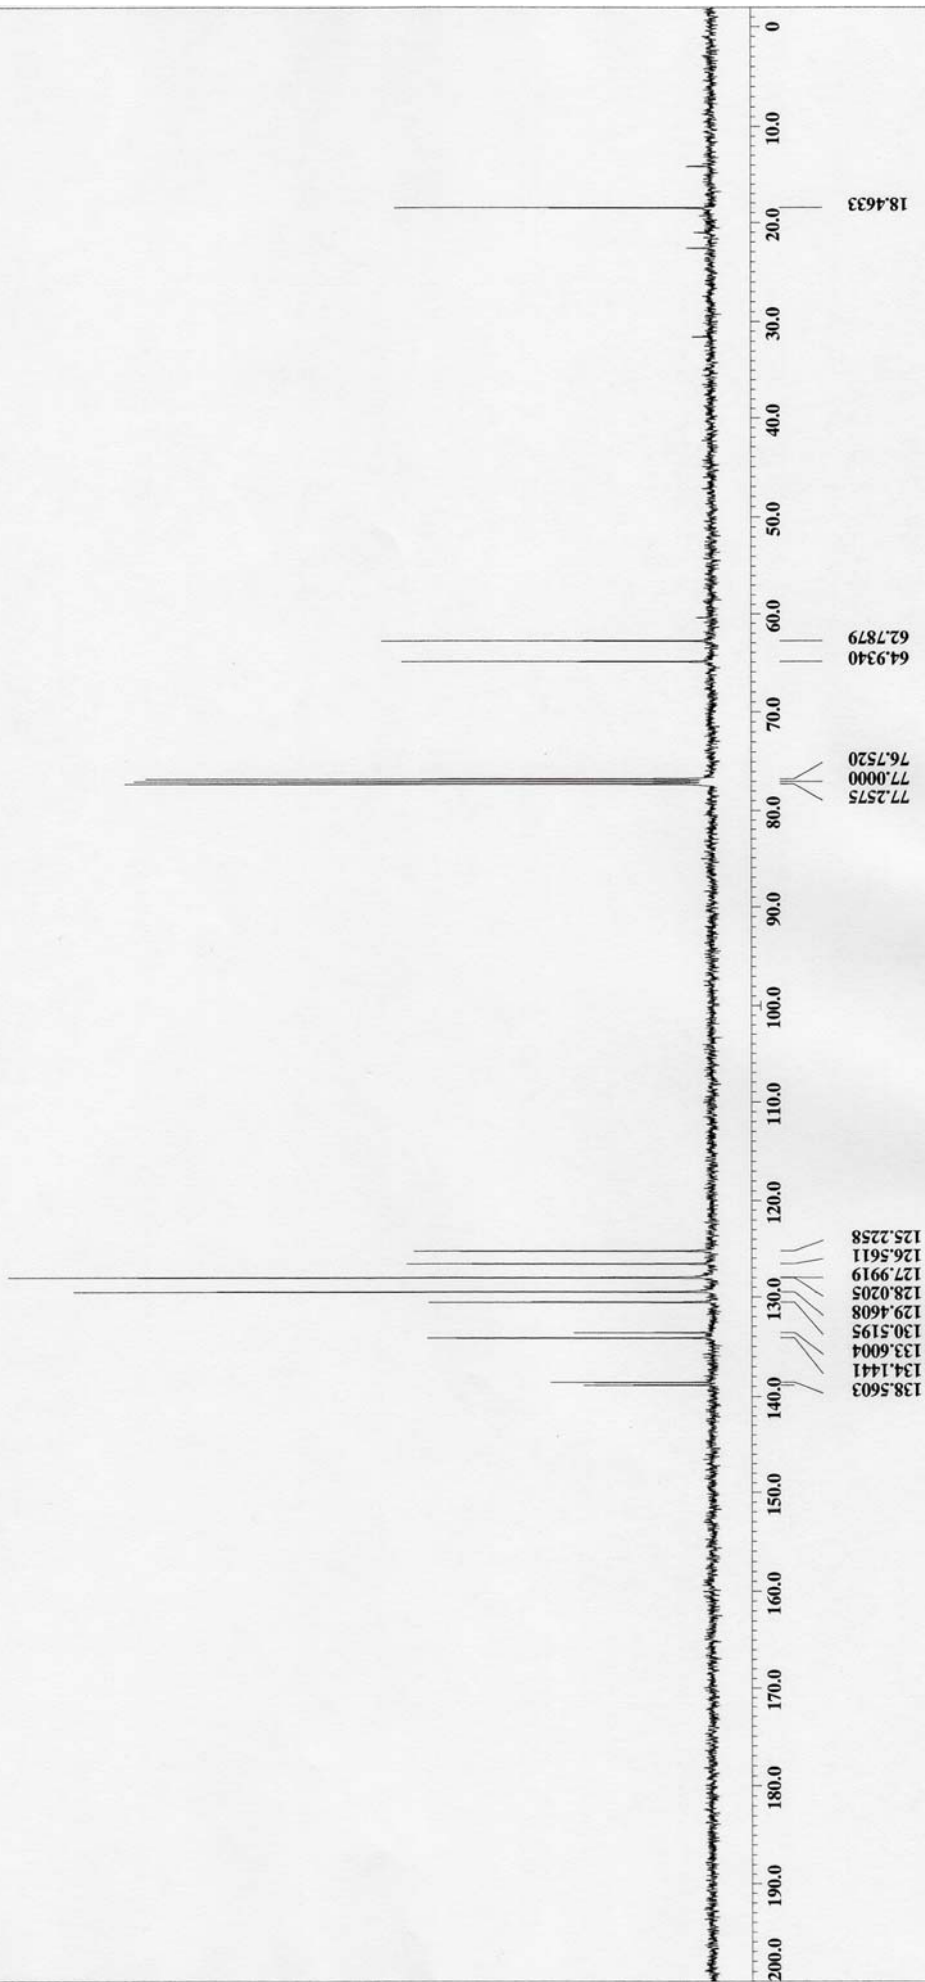

X : parts per Million : 13C

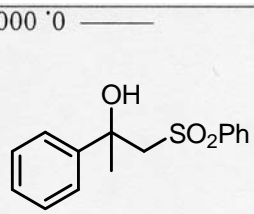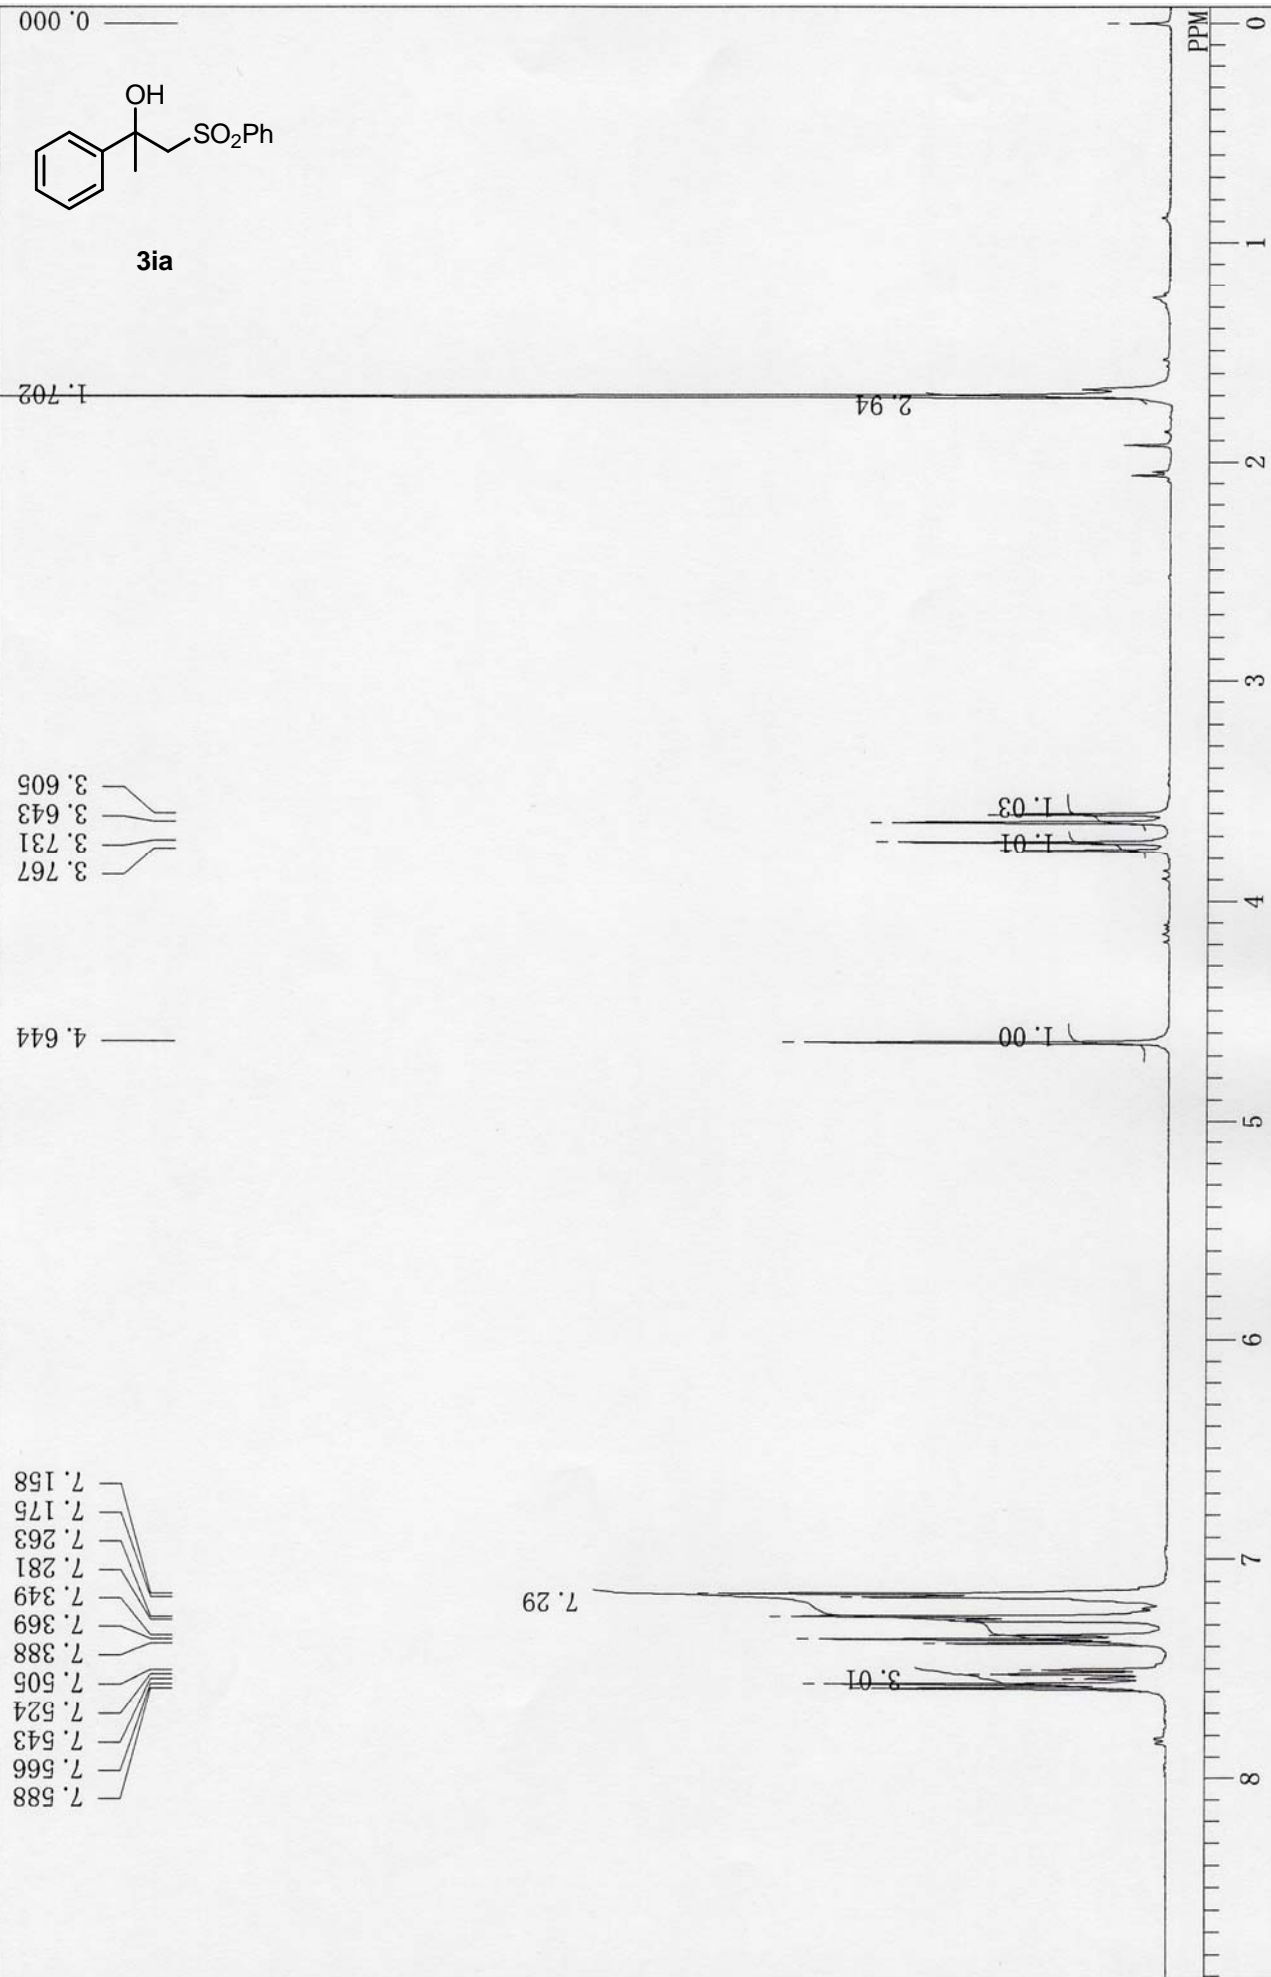

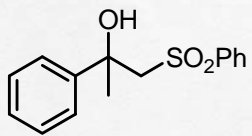

3ia

30.771

66.548

73.099

76.679

77.000

77.321

124.570

127.204

127.426

128.216

129.039

133.393

140.125

144.174

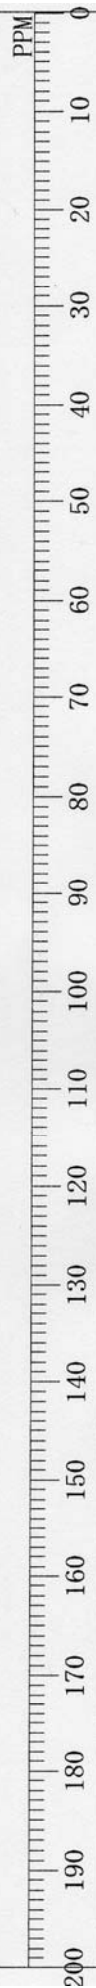

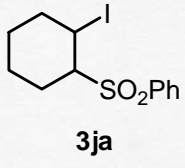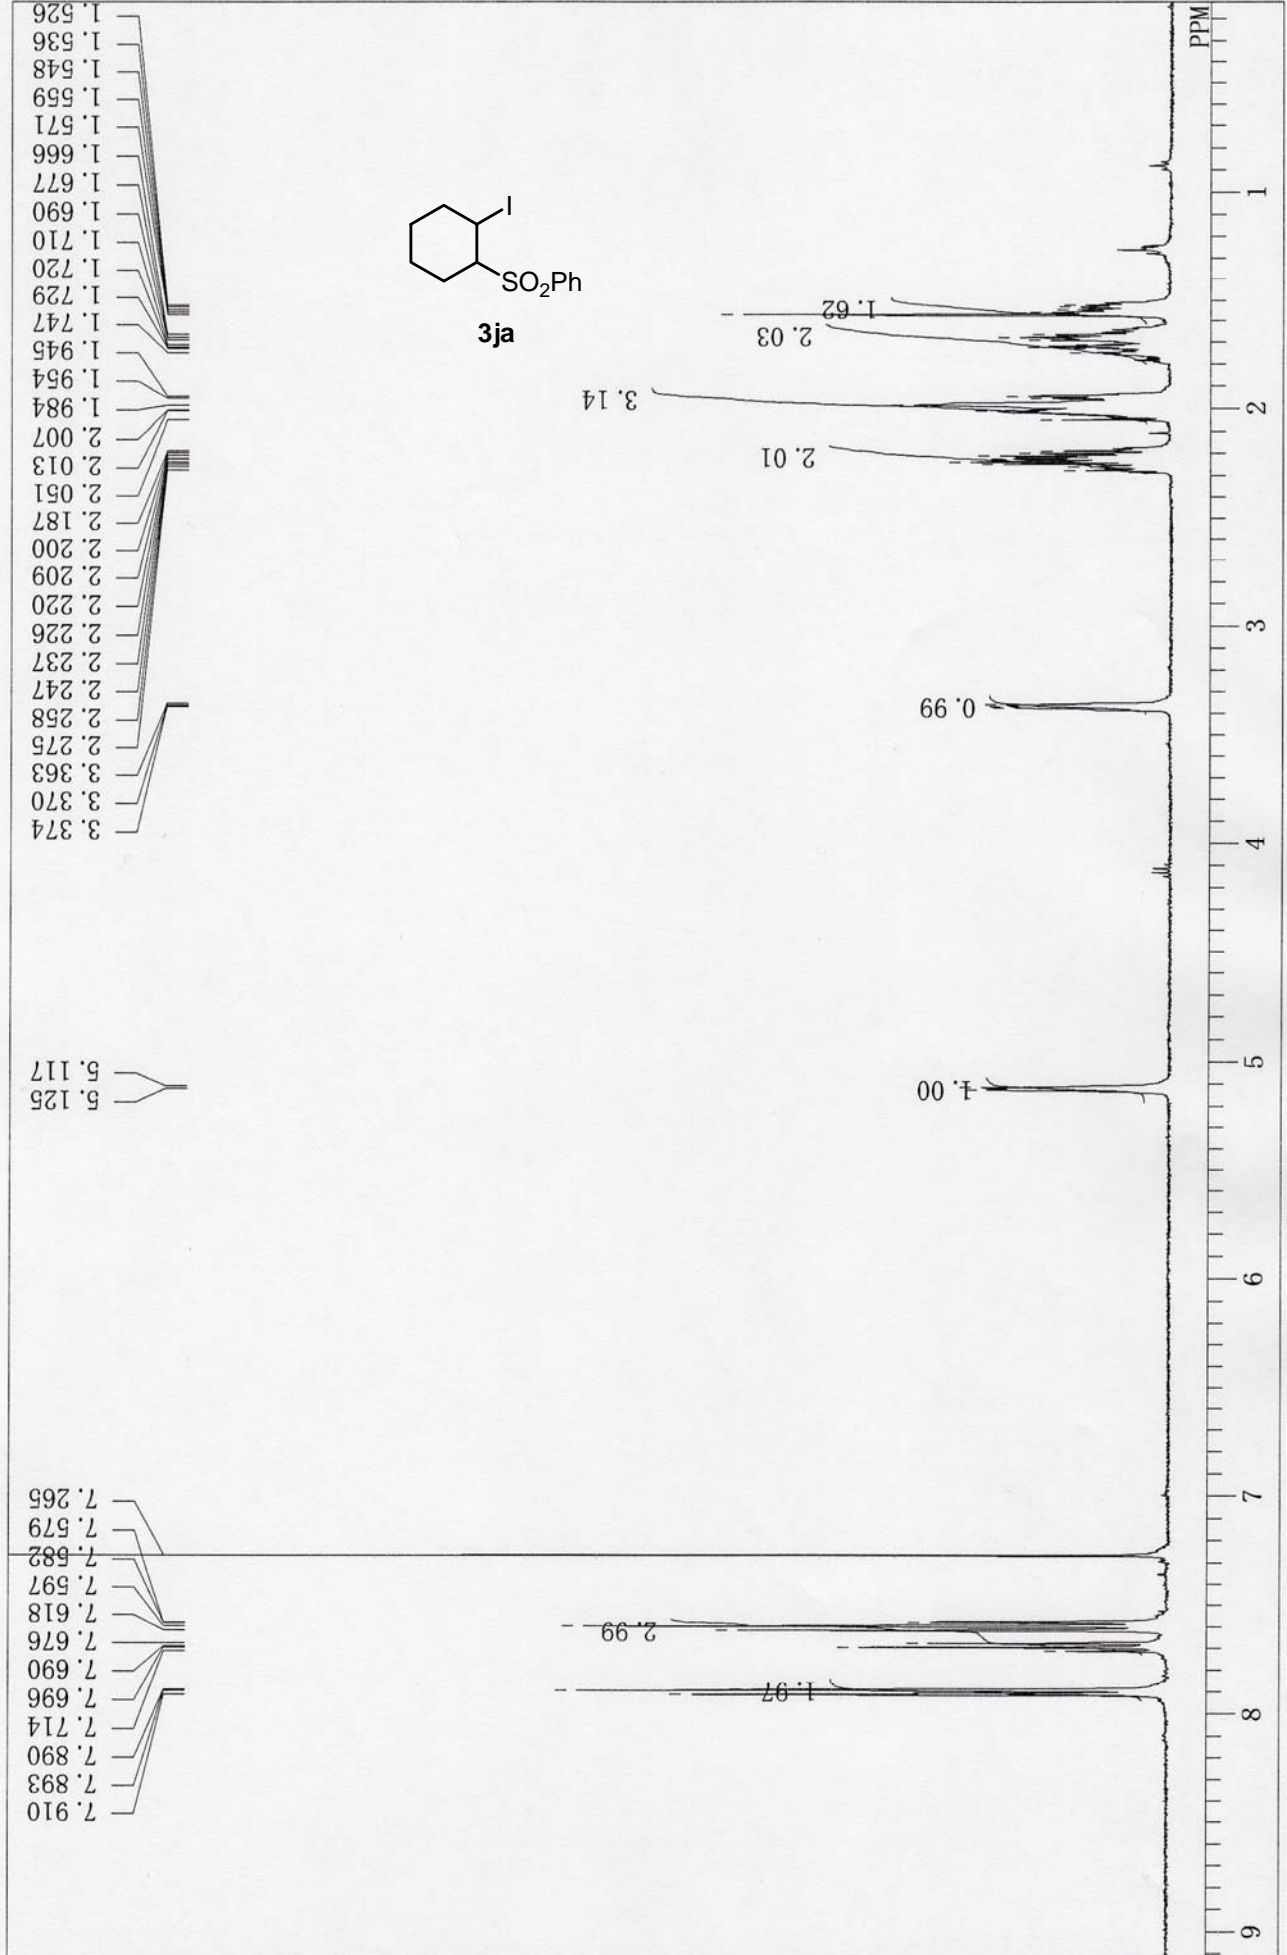



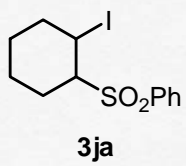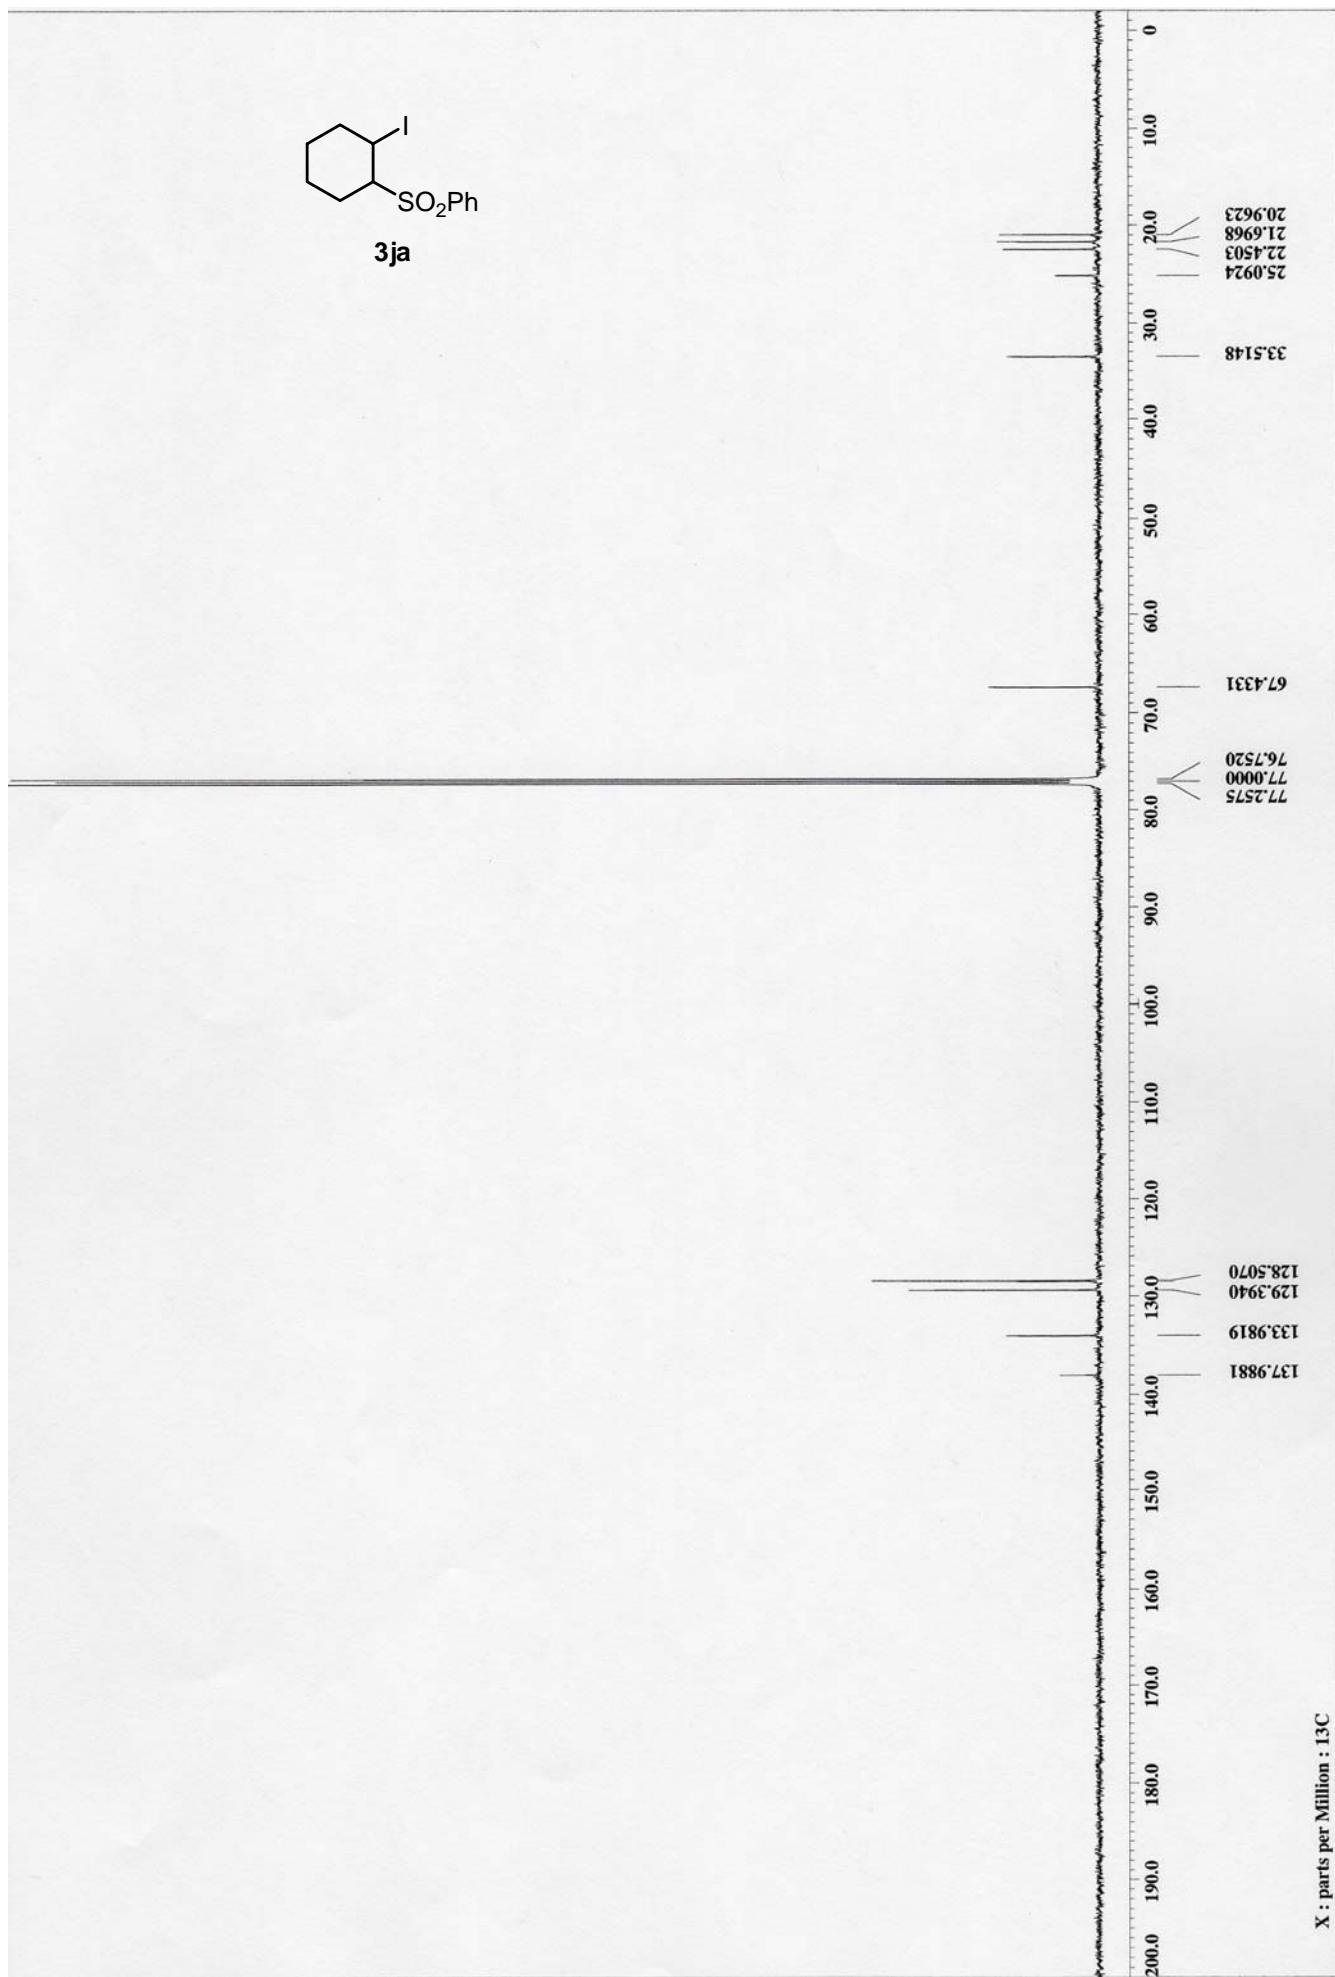

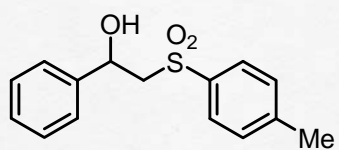

3ab

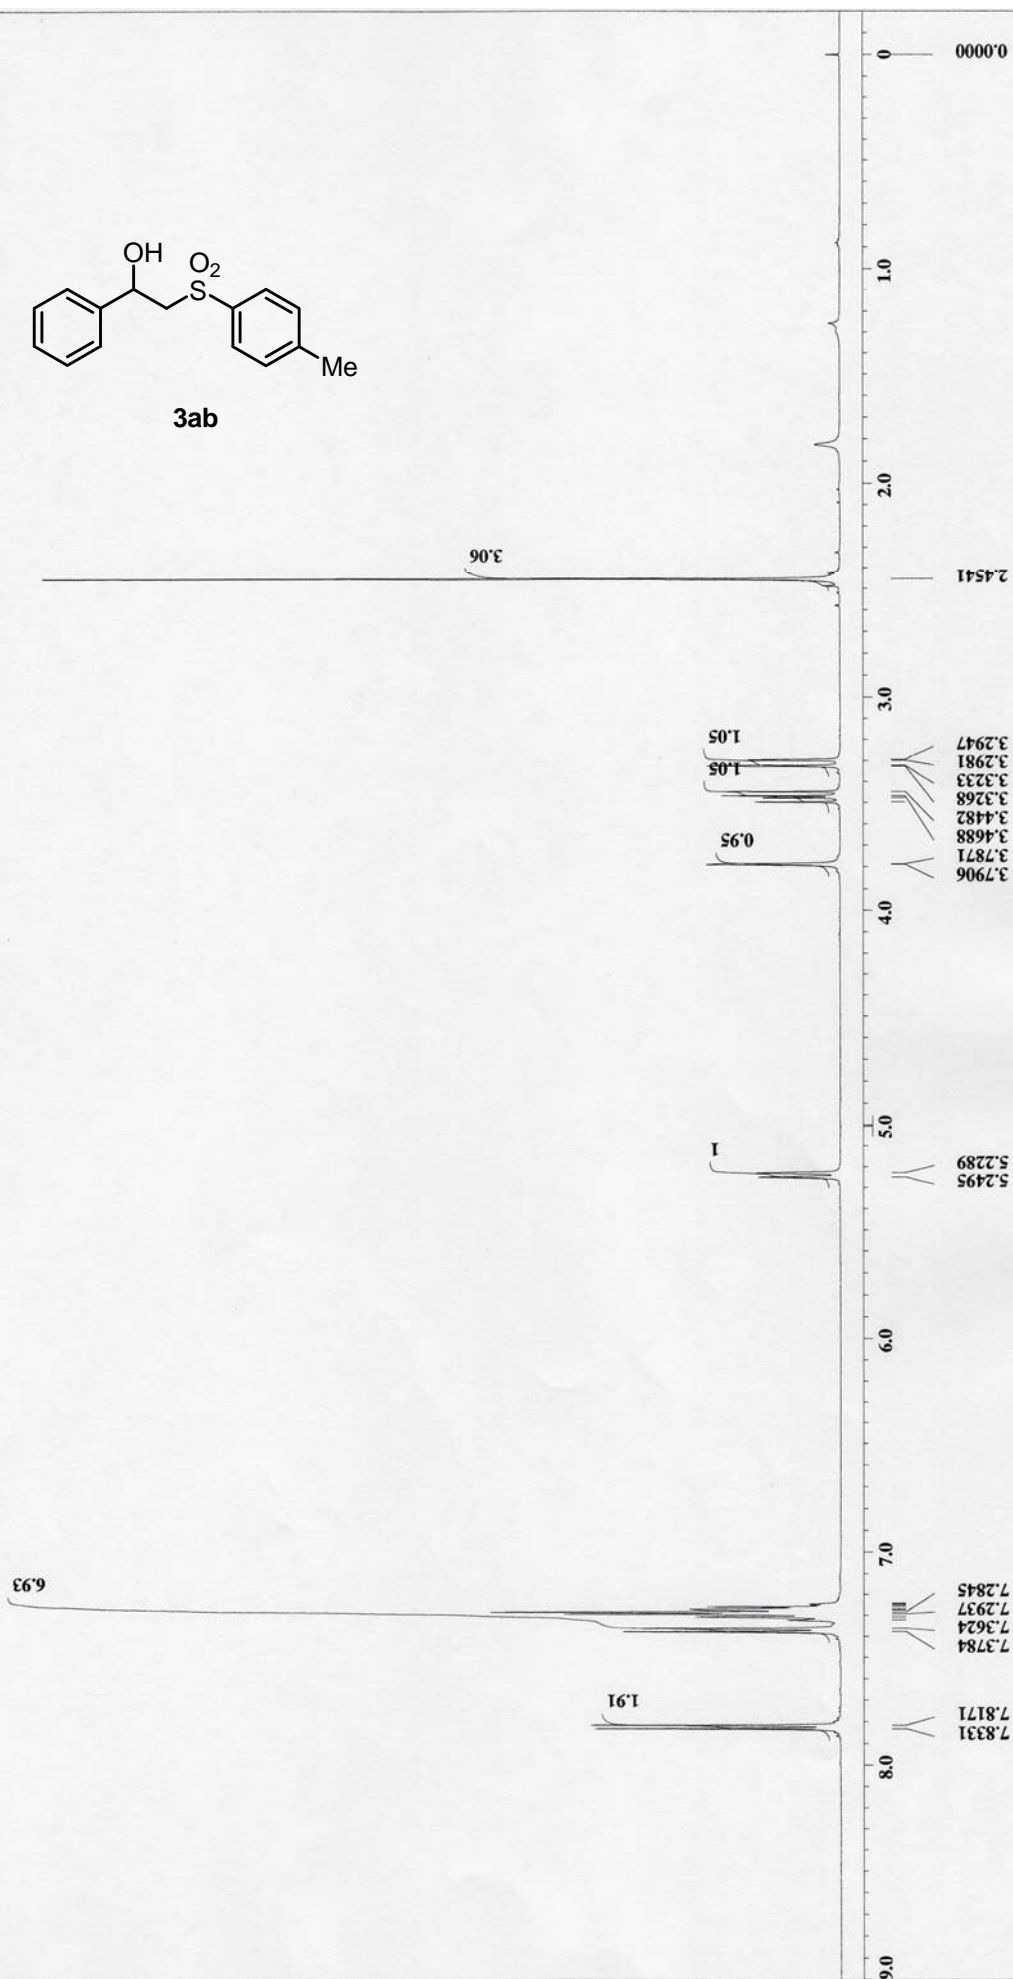

X : parts per Million : 1H

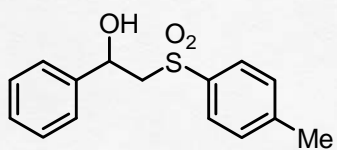

**3ab**

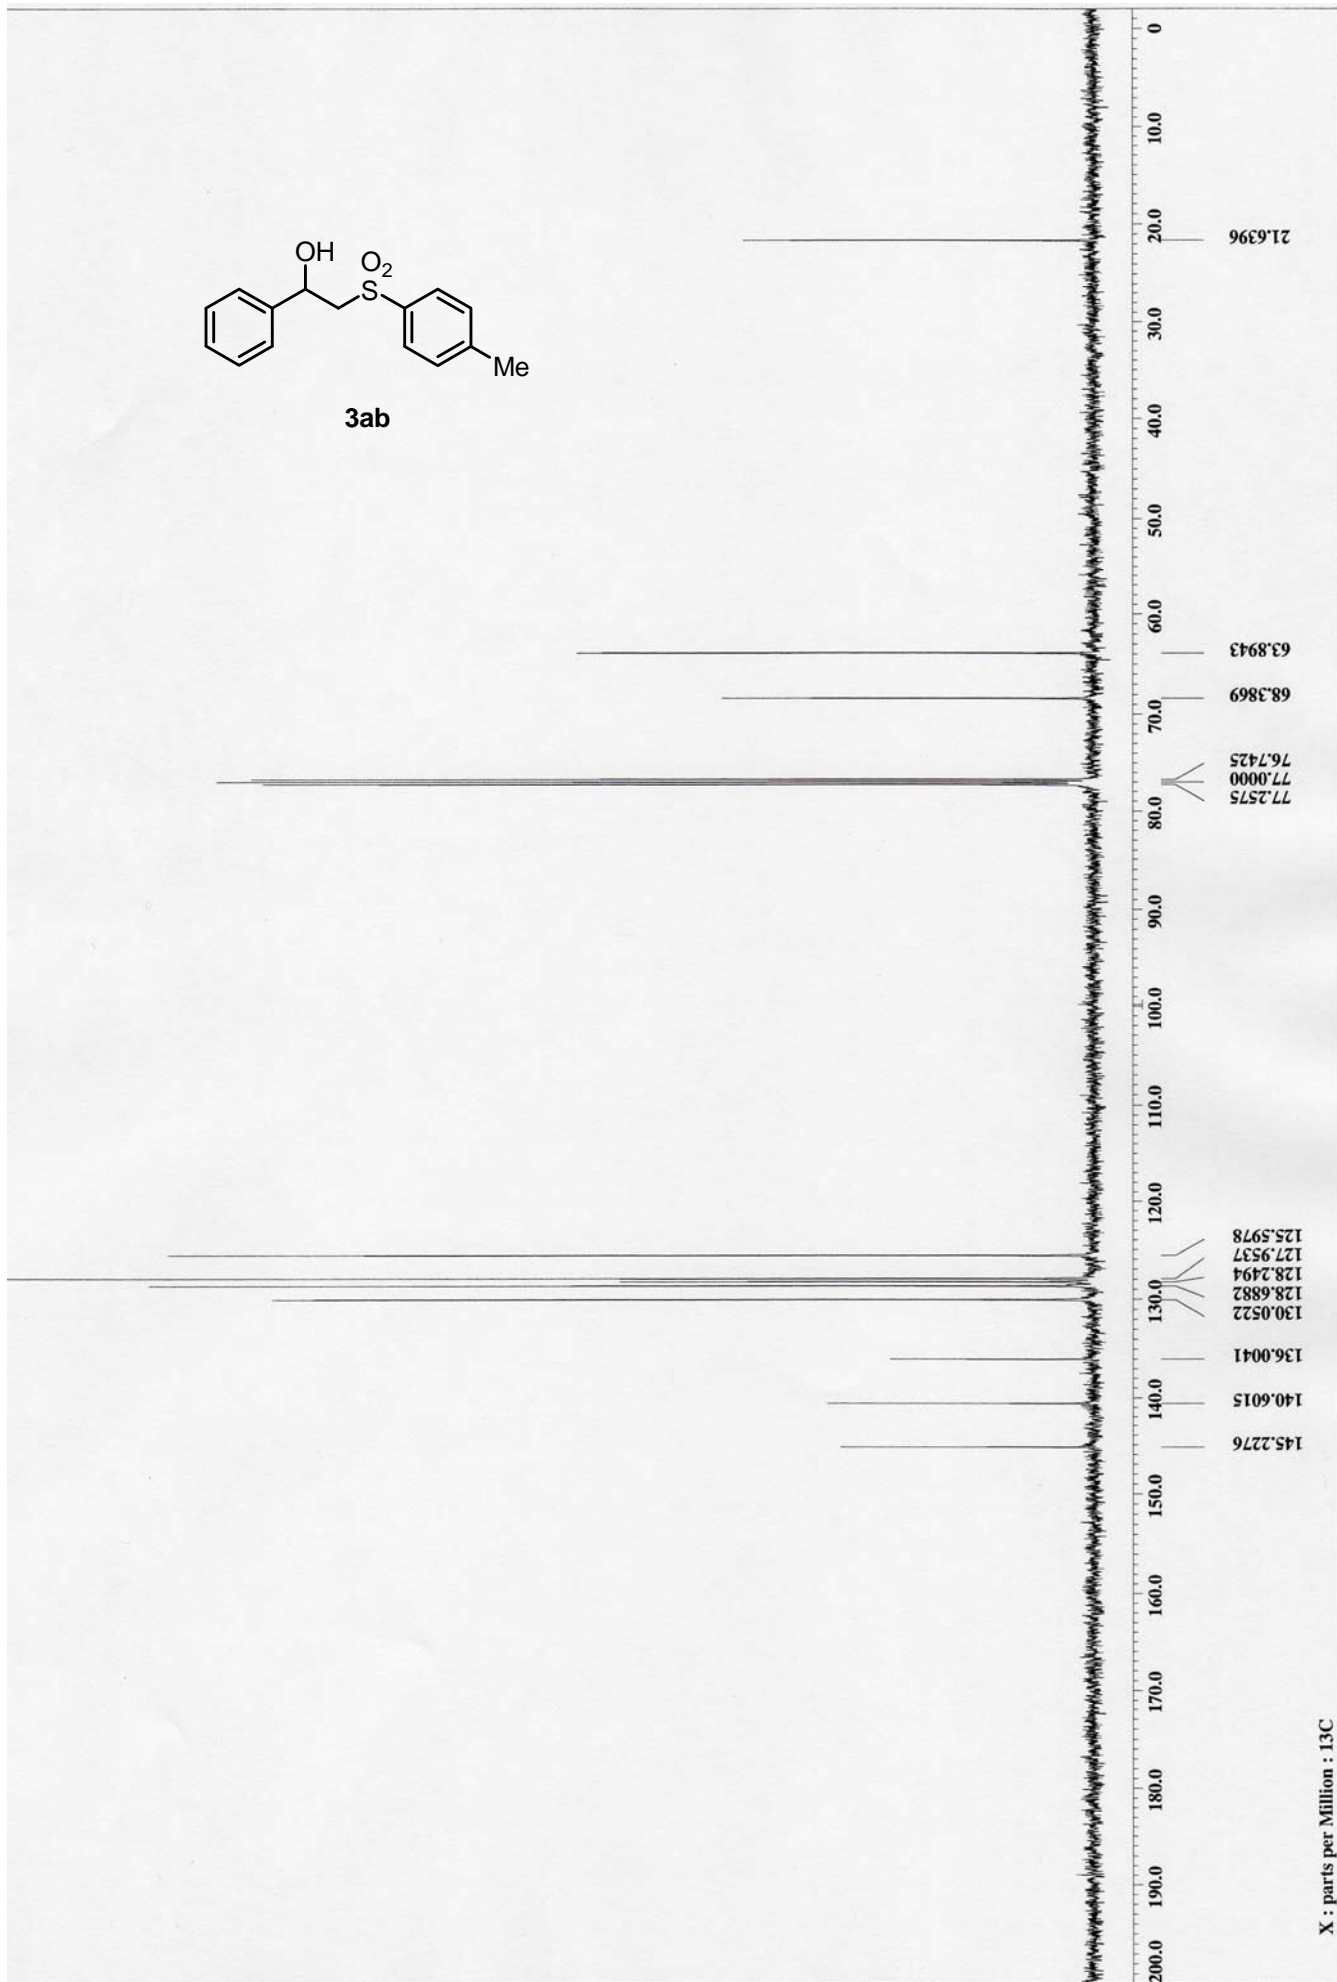

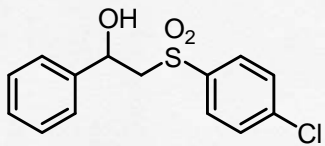

3ac

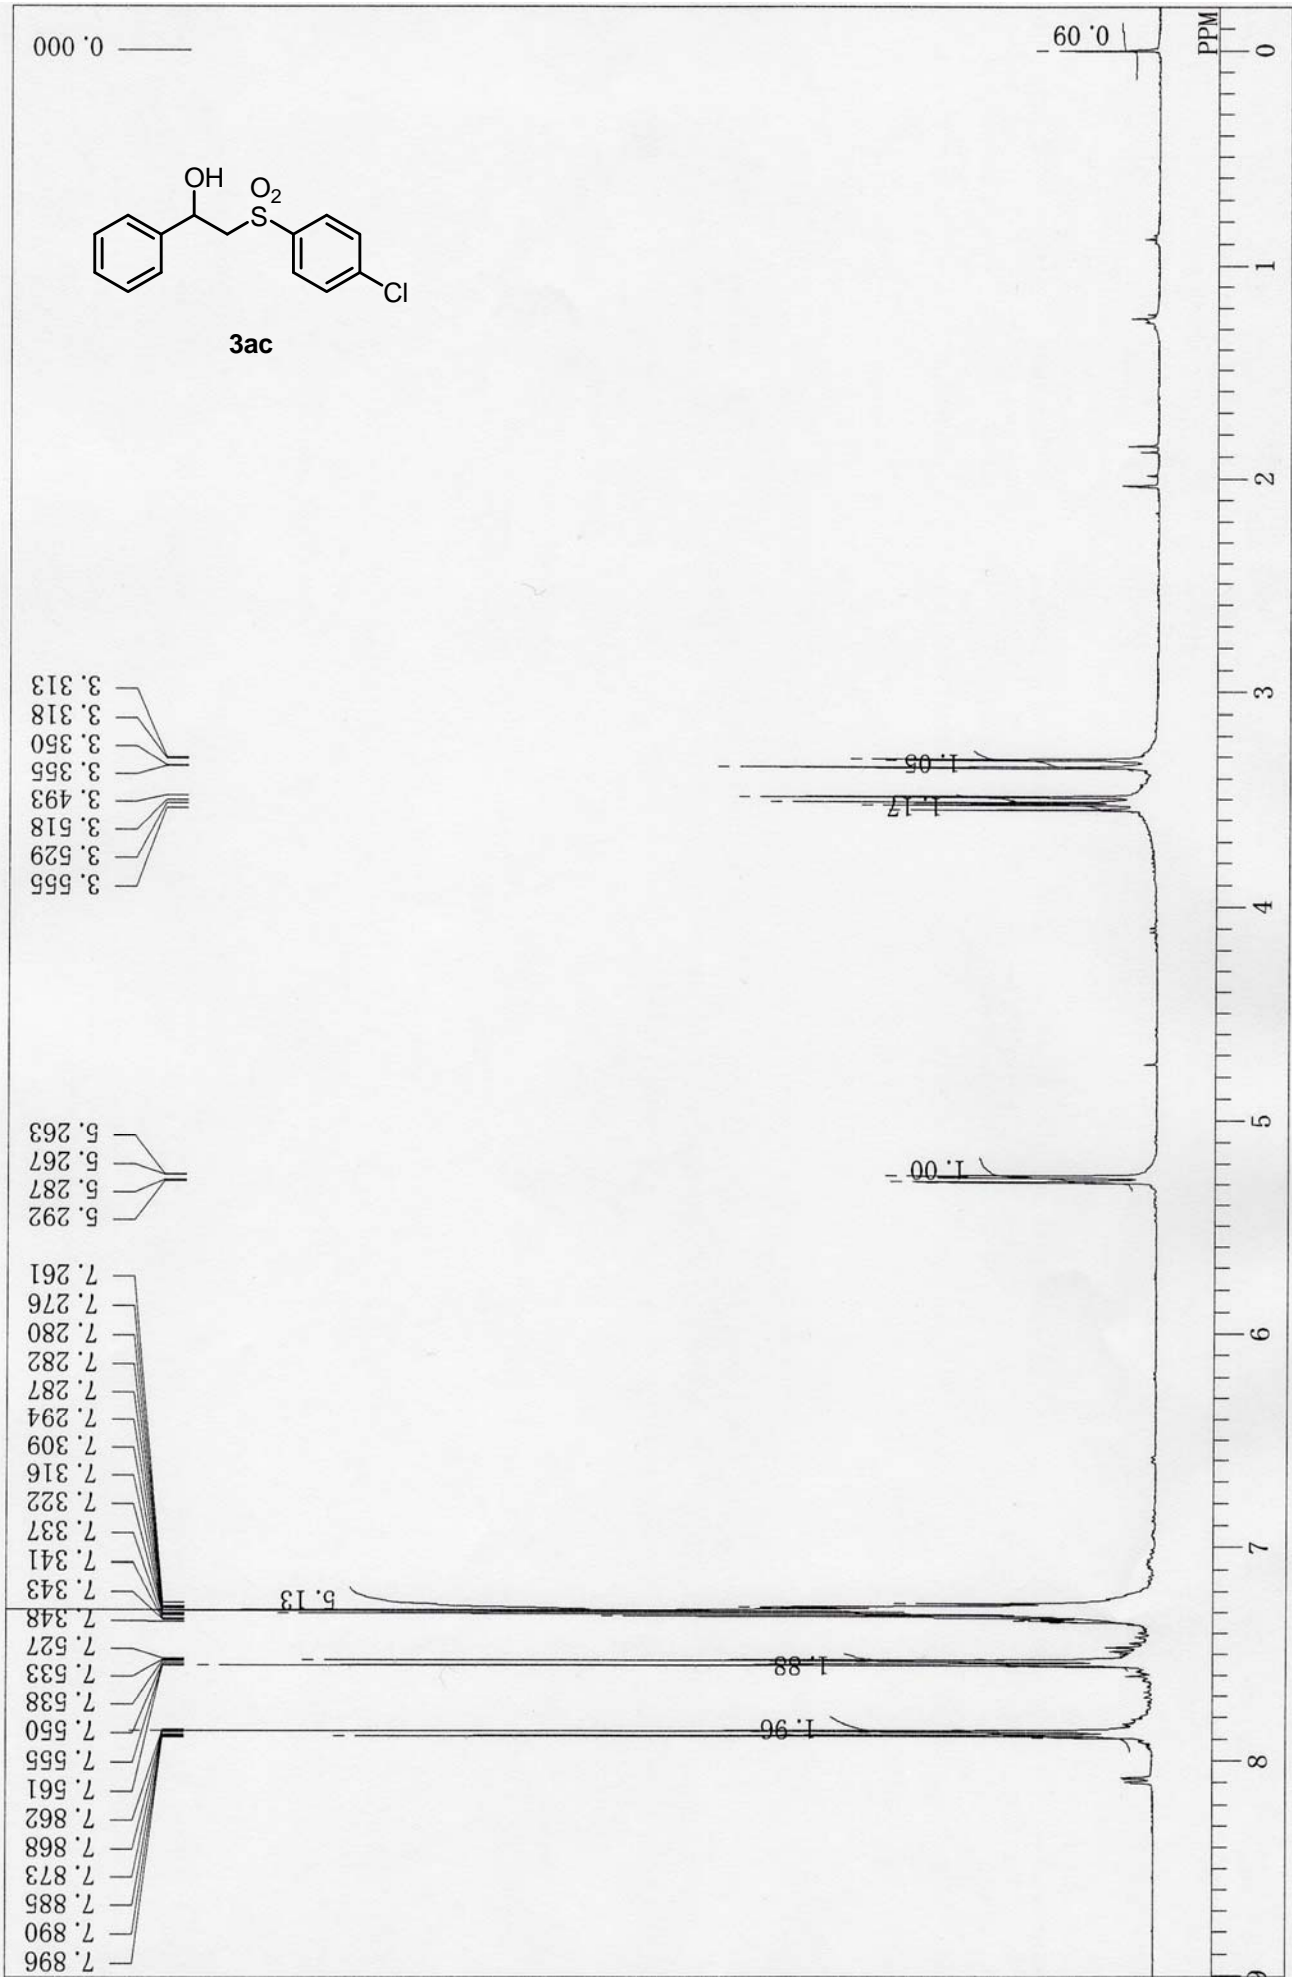

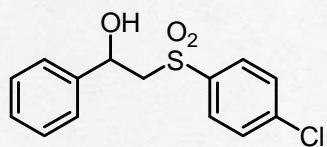

3ac

63.906  
68.515  
76.679  
77.000  
77.321

125.599  
128.413  
128.776  
129.500  
129.673  
137.722  
140.487  
140.792

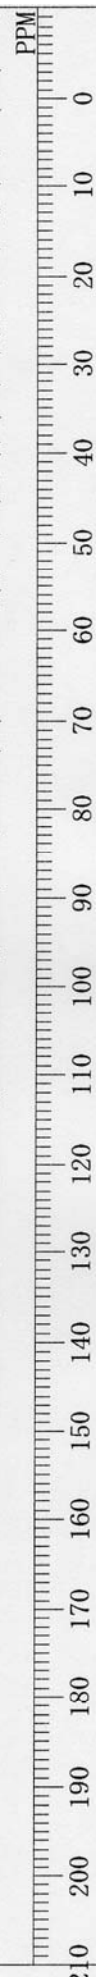

Supplement: c3ra47863g1.pdf [file c3ra47863g1.pdf]
